# Supplementary material for: Spatial variations in zooplankton community structure along the Japanese coastline in the Japan Sea: influence of the coastal current
Source: Copernicus journal article supplement (doi:10.5194/os-14-355-2018), 2018-06-01
Supplement: Supplementary file 1 [file os-14-355-2018-supplement.zip]

Archive with 2 entries (2 files):
- os-14-355-2018-supplement-title-page.pdf
- datasets.csv
