# Supplementary material for: Spatial variations in zooplankton community structure along the Japanese coastline in the Japan Sea: influence of the coastal current
Source: Copernicus journal article supplement (doi:10.5194/os-14-355-2018), 2018-06-01
Supplement: Supplementary file 1 [file os-14-355-2018-supplement.zip › datasets.csv]

Table S1 Data sets using in the db-RDA analysis. The unit of zooplankton abundance was individuals per cubic meter.
StationID	Year	Month	Day	Time (hour)	Latitude (degN)	Longitude (degE)	Bottom.depth (m)	Haul.depth (m)	mean.T (degC)	min.T (degC)	SST (degC)	mean.S	max.S	SSS	Zm (m)	SSChl.a (mg m-3)	Sagitta minima	Sagiita nagae	Evadne nordmanni	Podon leuckarti	Penilia avirostris	Metridia pacifica	Acartia omorii	Candacia bipinnata	Centropages bradyi	Calanus sinicua	Mesocalanus tenuicornis	Neocalanus plumchrus	Paracalanus parvus s.l.	Clausocalanus pergens	Ctenocalanus vanus	Pseudocalanus newmani	Oithona atlantica	Oithona plumifera	Corycaeus affinis	Oncaea mediterranea	Oncaea venusta	Themisto japonica	Euphausia pacifica	Fritillaria pellucida	Oikopleura longicauda
1999001	1999	5	12	13.83333333	37.17	137.9966667	170	150	11.07	9.86	14.27	33.87	34	33.54	10	0.25863385	3.4	0	0	0	0	18.9	0	0	0	18.9	56.6	0	0	6.3	0	27.2	268.3	4.2	4.2	0	0	3.4	31.4	0	5
1999002	1999	5	12	15.83333333	37.17	137.6633333	990	150	11.95	10.34	14.39	34.05	34.3	34.17	20	0.57971424	8.2	0.2	0	0	0	3.4	0	0	0	51.8	17.3	0	10.4	27.6	10.4	155.3	262.3	3.4	13.8	0	0	0	47.6	0	8.2
1999003	1999	5	13	6.033333333	37.003	137.6626667	69	64	12.4	10.64	14.84	33.94	34.11	33.4	10	0.67845976	6.8	0	0	0	0	15	0	0	0	195.2	75.1	0	15	15	15	195.2	1876.7	15	90.1	0	0	81.8	47.7	0	27.3
1999004	1999	5	13	8.616666667	36.837	137.33	698	150	13.68760309	12.23587629	15.60023196	34.22014359	34.38523196	33.91427835	18.56476684	0.67201596	3.6	0	74.5	0	0	0	0	9.6	0	64	38.4	0	6.4	3.2	12.8	28.8	233.6	0	6.4	0	0	38.1	20	0	16.4
1999005	1999	5	13	10.98333333	36.84016667	137.0833333	336	150	12.18	10.4	15.27	34.02	34.26	33.58	15	0.93503064	4.1	0	4.1	0	0	0	0	5.7	0	154.4	68.6	0	28.6	68.6	22.9	114.3	457.4	5.7	22.9	0	0	20.4	44.8	0	30.6
1999006	1999	5	13	12.55	37.01216667	137.0935	104	99	11.77	10.01	15.39	34.04	34.17	33.86	10	0.449290536	2.6	1.3	7.8	1.3	0	3.5	0	0	0	90.1	24.3	0	3.5	20.8	10.4	83.1	346.4	0	0	0	0	3.9	13	0	1.3
1999007	1999	5	14	7.05	37.17133333	137.0981667	65	60	13.74	11.6	15.24	34.04	34.2	33.82	25	0.53001106	3.1	0	18.9	28.3	0	19.9	0	0	0	158.9	79.4	0	26.4	19.9	13.3	66.2	456.7	0	33.1	0	0	103.8	147.8	0	15.7
1999008	1999	5	14	8.516666667	37.17	137.33	1230	150	12.14	10.31	14.97	34.08	34.32	33.62	15	0.87208116	4.5	1.8	0	0	0	5.3	0	0	0	53	66.2	0	2.6	10.6	8	278.1	177.5	5.3	10.6	0	0	54.5	21.8	0	5.5
1999009	1999	5	14	9.733333333	37.33666667	137.33	100	95	13.68	12.38	15.25	34.13	34.25	33.97	15	0.9100796	2.2	0	64.6	49	0	0	0	0	0	146	46.9	0	31.3	15.7	10.5	41.8	458.9	0	62.5	0	0	8.9	225.1	0	29
1999010	1999	5	14	12.36666667	37.58666667	137.33	90	85	13.64	12.53	15.47	34.27	34.35	34.22	18.56476684	0.42675507	0	0	0	0	0	0	0	0	0	0	0	0	0	0	0	0	0	0	0	0	0	0	0	0	0
1999011	1999	5	14	15.31666667	37.67	136.9966667	60	55	13.77	12.1	16.04	34.2	34.4	34.18	25	0.38811985	3.5	0	15.7	0	0	10.6	0	0	0	112.7	28.2	0	14.1	17.6	24.7	21.1	52.8	0	38.7	0	0	10.6	98.6	0	91.6
1999012	1999	5	14	14.26666667	37.50333333	136.9966667	90	85	14.16	12.55	16.16	34.4	34.52	34.37	20	0.3483201	7.9	3.9	0	47.1	0	14.2	0	0	0	106.4	35.5	0	28.4	7.1	21.3	21.3	432.6	0	63.8	0	0	19.6	141.4	0	172.8
1999013	1999	5	14	6.966666667	37.67	136.6633333	120	115	11.34	7.32	15.35	34.2	34.47	34.34	18.56476684	0.43067622	0	0	0	0	0	0	0	0	0	0	0	0	0	0	0	0	0	0	0	0	0	0	0	0	0
1999014	1999	5	15	8.166666667	37.50333333	136.6633333	120	115	11.61	6.97	15.69	34.2	34.43	34.41	25	0.35412434	5.2	10.5	0	0	0	28.8	2.6	0	0	138.9	65.5	13.1	28.8	26.2	36.7	89.1	76	15.7	83.9	2.6	2.6	7.9	13.1	0	68.2
1999015	1999	5	15	9.316666667	37.33666667	136.6633333	100	95	13.89	12.75	16.03	34.35	34.52	33.92	20	0.3966779	6.5	6.5	32.4	0	0	0	0	0	0	166.2	57.5	0	25.6	3.2	16	6.4	32	19.2	28.8	0	0	8.7	138.4	0	224.9
1999016	1999	5	15	12.21666667	37.00333333	136.6633333	50	45	14.24	12.82	16.38	34.18	34.33	33.91	15	0.22923987	9.9	9.9	69.2	49.4	0	9.3	18.5	0	0	508.5	9.3	0	55.5	9.3	46.3	18.5	212.6	27.8	83.2	0	0	0	0	0	350.9
1999017	1999	5	15	13.76666667	36.83666667	136.6633333	40	35	15.02	13.58	16.28	34.03	34.23	33.87	15	0.47996965	0	13.3	239	26.6	0	0	13.3	0	0	232.3	19.9	0	13.3	13.3	33.2	6.6	46.5	0	13.3	6.6	0	0	0	0	192.5
1999018	1999	5	16	6.733333333	36.50333333	136.33	70	65	14.63	13.64	15.74	34.28	34.5	33.89	20	0.46247908	0	0	19.7	88.6	4.9	0	4.9	0	14.8	260.8	14.8	0	24.6	9.8	54.1	14.8	157.5	19.7	113.2	0	0	0	0	0	44.3
1999019	1999	5	16	9.633333333	36.17	135.9966667	100	95	14.83	13.91	17.23	34.43	34.52	34.22	15	0.068253756	0	10.3	5.1	0	5.1	0	5.6	0	0	52.7	19.4	0	19.4	11.1	83.2	8.3	94.3	55.5	99.9	5.6	0	5.1	15.4	0	84.8
1999020	1999	5	16	11.21666667	36.00333333	135.83	270	150	13.89	11.51	17.39	34.25	34.56	34.23	10	0.27243304	3.6	2.4	7.2	0	1.2	0	5.6	1.9	0	30	11.2	0	16.9	28.1	71.2	0	28.1	13.1	50.6	1.9	0	3.6	40.8	0	28.8
1999021	1999	5	16	14.4	35.83666667	135.83	130	125	14.7	13.51	17.39	34.49	34.56	34.46	15	0.35419938	6.2	4.6	4.6	0	0	0	0	0	0	38.4	16.9	0	6.2	20	40	3.1	21.5	1.5	23.1	0	0	10.8	30.8	0	56.9
1999022	1999	5	17	7.7	35.67	135.83	80	75	15.9	14.73	17.74	34.38	34.5	34.22	15	0.3357465	3.8	0	0	0	7.6	0	7.6	3.8	0	190.2	7.6	0	11.4	7.6	60.9	3.8	3.8	125.5	95.1	15.2	3.8	11.4	0	0	7.6
1999023	1999	5	17	9.183333333	35.67	135.58	90	85	15.53	14.42	17.21	34.46	34.54	34.41	10	0.25806385	2.1	6.3	0	0	0	0	2.1	2.1	0	35.8	0	0	0	2.1	25.3	0	4.2	40	65.3	0	0	4.2	6.3	0	54.8
1999024	1999	5	16	13.06666667	35.83666667	135.58	200	150	14.41	11.74	17.35	34.36	34.59	34.38	15	0.2870728	0	1.8	0	0	1.8	0	0	0	0	24.6	14.1	0	5.3	3.5	38.7	0	1.8	17.6	17.6	3.5	0	5.3	14.1	0	42.2
1999025	1999	5	17	11.01666667	35.83666667	135.33	120	115	15.31	12.48	17.56	34.47	34.58	34.31	10	0.29898182	0	11.8	0	0	0	0	0	2.4	0	11.8	0	0	2.4	4.7	4.7	0	2.4	28.2	37.7	2.4	2.4	2.4	7.1	0	18.8
1999026	1999	5	17	12.4	35.67	135.33	70	65	15.85	14.59	18.27	34.33	34.47	33.96	10	0.5009911	0	7.8	3.9	0	3.9	0	3.9	0	0	128.1	0	0	7.8	31.1	38.8	0	3.9	38.8	66	3.9	0	7.8	3.9	0	15.5
2000001	2000	5	11	13.66666667	37.17	137.9966667	170	150	11.75	10.6	13.79	34.16	34.29	34.13	15	0.22782041	1.7	2.1	46.9	6.9	0	5.3	2.7	0	0	36.1	9.4	0	16.1	4	2.7	4	111	0	41.5	0	0	0.3	135.1	0	4.1
2000002	2000	5	11	15.56666667	37.17	137.6633333	990	150	11.21	9.99	15	34.08	34.21	33.21	10	0.5386532	0	0	64.2	1.8	0	14.6	0	0	0	4.9	2.4	0	51.1	7.3	2.4	46.2	338.1	0	12.1	0	0	1.8	302.8	0	13.2
2000003	2000	5	12	7.1	37.003	137.6626667	69	64	12.73	12.08	13.51	33.92571429	34.22	33.72	15	0.26879445	7.3	5.8	357.9	81.8	0	0	4.8	0	9.8	277.4	14.6	0	63.3	19.5	9.8	0	107.1	0	340.6	0	4.8	5.8	661.7	0	24.8
2000004	2000	5	12	9.833333333	36.837	137.33	698	150	11.66	10.06	14.45	34.01	34.2	33.91	10	1.0752716	3.3	0.9	99.4	21.6	0	0	0	0	0	60.7	5.5	0	16.6	3.7	0	0	163.7	0	47.8	0	0	1.8	377.6	0.3	9.7
2000005	2000	5	12	12.06666667	36.84016667	137.0833333	336	150	11.7	9.94	15.81	34.04	34.17	33.77	10	0.59610415	4.8	0.6	106.9	6	0	1.8	3.5	0	0	34.8	10.4	0	31.3	1.8	0	0	156.4	0	53.9	0	0	1.8	178	0	22.1
2000006	2000	5	12	13.58333333	37.01216667	137.0935	104	99	11.78	9.58	14.91	34.09	34.22	33.99	15	0.53349745	0.7	1.3	26.2	6.7	0	2.7	1.3	0	0	29.7	10.8	0	12.2	2.7	5.4	1.3	135.3	8.1	0	0	0	0	64.4	0	15.8
2000007	2000	5	12	14.96666667	37.17133333	137.0981667	65	60	13.43	11.86	15.05	34.08	34.27	34.01	20	0.4926982	0.8	3.3	43.4	30.1	0	0	6	0	2.9	136	11.8	0	65	14.8	8.9	0	41.3	0	195.1	0	0	0.8	61.8	0	15.9
2000008	2000	5	13	9.75	37.17	137.33	1230	150	11.78	10.26	15.71	34.02	34.25	32.94	10	0.5509711	2.5	1.2	5.9	9.6	0	0	3.2	0	1.6	43.5	14.5	0	14.5	4.8	1.6	3.2	107.9	0	62.8	0	0	2.5	279.2	0	4.3
2000009	2000	5	13	11.01666667	37.33666667	137.33	100	95	13.53	12.6	14.99	34.21	34.39	34.05	15	0.3284063	1.7	1.9	2.8	12.4	0	1.9	1.9	0	1	53.3	10.7	1	8.7	6.8	8.7	0	7.7	0	87.2	0	0	1.9	26.7	0.4	14.3
2000010	2000	5	13	13.08333333	37.58666667	137.33	90	85	13.64	12.87	15.35	34.31	34.43	33.91	15	0.17987935	3.3	3.6	2.2	2.2	0	0	1.5	1.5	7.1	121.8	1.5	1.5	8.5	21.2	9.9	0	12.8	0	127.6	5.6	2.8	4.7	6.2	0	66.6
2000011	2000	5	13	16.28333333	37.67	136.9966667	60	55	13.68	12.37	15.62	34.37	34.49	34.14	10	0.20348206	1.5	3	2.7	1.3	0	0.9	0.9	6.1	2.6	46	4.3	4.3	2.6	3.5	4.3	0	2.6	0	41.6	5.2	0	1.8	3.8	0	96.1
2000012	2000	5	13	15.2	37.50333333	136.9966667	90	85	13.93	13.48	15	34.43	34.52	34.31	10	0.201318	4.1	2.7	1.8	1.8	0	0	1.4	2.7	1.4	99.4	4.1	1.4	2.7	9.7	20.7	1.4	4.1	0	41.3	1.4	0	4.1	11.4	0.9	96.4
2000013	2000	5	14	7.066666667	37.67	136.6633333	120	115	13.35	11.27	15.49	34.38	34.5	34.04	15	0.20407195	3.6	5.3	0.4	0.4	0	1.2	2.4	5.9	0	45.8	3.5	1.2	2.4	5.9	12.9	0	15.3	0	57.6	4.7	0	2.1	13.5	0	15.7
2000014	2000	5	14	8.25	37.50333333	136.6633333	120	115	13.37	11.15	15.52	34.41	34.53	34.21	15	0.03363929	3.9	4.9	1.1	0	0	7	2.8	1.4	1.4	67.2	7	2.8	2.8	1.4	12.6	0	12.6	1.4	54.6	0	4.2	1.4	13.3	0	14.4
2000015	2000	5	14	9.4	37.33666667	136.6633333	100	95	13.17	10.83	14.38	34.43	34.54	34.35	40	0.449290536	1.5	8	6.1	0	0	7.6	3.2	8.7	2.2	78.1	11.9	4.3	2.2	1.1	4.3	1.1	13	0	71.6	2.2	0	1.5	13.3	0	67.8
2000016	2000	5	14	11.78333333	37.00333333	136.6633333	50	45	14.49	13.8	15.93	34.38	34.6	33.85	15	0.2558664	2.5	4.3	95.8	2.5	0	0	1.8	14.7	5.5	133.8	9.1	5.5	5.5	7.3	14.7	1.8	34.8	0	58.7	1.8	1.8	8.3	9	0.7	173.6
2000017	2000	5	14	13.1	36.83666667	136.6633333	40	35	14.8	13.75	16.47	34.29	34.52	33.74	10	0.26343888	1.7	3.4	99.8	0	0	0	3.7	1.8	0	194.1	3.7	5.5	11	7.3	9.2	0	3.7	0	67.8	1.8	0	6.2	5.6	0	307.9
2000018	2000	5	16	6.833333333	36.50333333	136.33	70	65	14.55	13.8	15.63	34.55	34.61	34.34	20	0.42911008	2.7	2.7	12.2	0	0	0	0	3.5	0	552.9	13.9	0	10.4	10.4	10.4	0	27.9	0	97.4	0	3.5	8.2	0	3.4	171.9
2000019	2000	5	16	9.3	36.17	135.9966667	100	95	13.96	11.57	16.11	34.47	34.63	34.38	15	0.519524	9.5	8.7	3.5	0	0	0	3.1	6.3	0	244.2	6.3	0	9.4	3.1	34.5	0	56.4	0	59.5	0	0	2.6	0.9	3.5	66.6
2000020	2000	5	16	10.9	36.00333333	135.83	270	150	12.32	9.99	16.11	34.25	34.59	34.41	15	0.75154465	1	2.4	18.1	0	0	0	0	1.4	0	80.4	12.5	0	8.3	8.3	9.7	6.9	85.9	0	43	2.8	0	8.2	50.9	0	18.8
2000021	2000	5	16	12.68333333	35.83666667	135.83	130	125	13.41	10.31	16.5	34.44	34.61	34.43	15	0.48357415	1.6	4.7	0	0	0	0	3.4	3.4	3.4	149.9	34.1	0	10.2	20.4	47.7	0	105.6	6.8	68.2	6.8	0	8.6	116	0	110.5
2000022	2000	5	16	14.1	35.67	135.83	80	75	14.35	13.68	16.32	34.4	34.45	34.13	10	0.5708768	2	15.3	0	0	0	0	2.1	1.1	0	92.9	1.1	1.1	1.1	1.1	9.4	0	4.2	0	55.3	5.2	0	8.6	1	0	44.8
2000023	2000	5	17	7.766666667	35.67	135.58	90	85	14.43	13.16	16.73	34.37	34.54	34.2	10	0.6483518	1.1	7.8	0	0	0	0	0	14.3	0	99.3	1.2	0	2.4	0	7.2	0	1.2	0	21.6	3.6	1.2	10.6	0.6	0	30.2
2000024	2000	5	17	9.216666667	35.83666667	135.58	200	150	13.12	10.86	16.15	34.38	34.6	34.45	10	0.33750778	3.5	0.7	5.9	0	0	3.5	1.7	1.7	0	47.1	10.5	0	7	14	50.6	7	88.9	15.7	17.4	1.7	0	3.8	36	1.7	49.1
2000025	2000	5	17	10.58333333	35.83666667	135.33	120	115	14.34	10.92	16.5	34.52	34.62	34.46	15	0.21567811	0.7	7.4	0	0	0	0	2.2	13.4	0	254.4	8.9	0	6.7	2.2	13.4	0	58	29	84.8	11.1	0	16.1	3.4	0	123.3
2000026	2000	5	17	12.05	35.67	135.33	70	65	15.07	14.27	16.63	34.49	34.58	34.28	10	0.449290536	4.6	9.3	0	0	0	2.1	4.3	15	4.3	194.5	2.1	0	6.4	4.3	15	0	15	0	113.3	6.4	0	17.8	2.3	0	102
2001001	2001	5	11	14.63333333	37.17	137.9966667	170	150	11.54	10	15.4	33.76	34.13	31.85	15	0.72004795	1	0	0	0	0	68.7	0	0	0	8.1	2.7	5.4	2.7	1.3	1.3	29.6	36.4	0	0	0	0	11.2	31.6	0	0.6
2001002	2001	5	11	16.88333333	37.17	137.6633333	990	150	11.16	9.81	14.93	33.96	34.09	33.22	20	0.2738206	0.9	0	0	0	0	75.2	0	0	0	2.5	5.1	6.4	1.3	0	1.3	31.9	28.1	0	2.5	0	0	7.3	12	0	1.7
2001003	2001	5	12	7.066666667	37.003	137.6626667	69	64	11.95	10.73	15.11	33.26	34.02	30.86	15	0.76690423	1	0	1.4	0	0	113.1	0	0	0	8.2	5.4	0.4	5.4	99.6	8.1	13.5	102.3	0	5.4	0	0	0	16.6	0	5.5
2001004	2001	5	12	9.7	36.837	137.33	698	150	11.18	9.56	14.67	33.96	34.1	33.47	20	0.2146946	0.3	0	0.6	0	0	16.7	0	0	0	4.2	1.4	0	2.8	8.4	11.1	19.5	132.3	0	1.4	0	0	6.3	19.5	0	4.2
2001005	2001	5	12	11.96666667	36.84016667	137.0833333	336	150	11.29	10.2	14.04	33.95	34.07	33.26	10	0.24218719	0.4	0	3.9	0	0	18.7	0	0	0	3.1	4.7	0	3.1	7.8	9.3	60.7	163.4	0	4.7	0	0	0	58.4	0	5.9
2001006	2001	5	12	13.56666667	37.01216667	137.0935	104	99	12.63	11.41	14.44	33.98	34.12	33.52	20	0.23146018	6.1	0.8	10	0	0	5.9	1	0	0	5.2	4.9	1.7	4.9	10.9	5.9	20.8	124.7	0	6.9	2	0	11.7	220.3	0	8.8
2001007	2001	5	12	15.03333333	37.17133333	137.0981667	65	60	14.16	12.09	15.65	33.98	34.09	33.47	10	0.075747065	5	0.6	20.3	0	0	1	0.7	0	0.3	8.9	2	1.3	3.8	1.7	1.7	3.1	28.2	0	19.6	0	0.3	8.6	5	0	36.1
2001008	2001	5	13	9.616666667	37.17	137.33	1230	150	10.95	9.16	14.79	33.96	34.08	33.18	15	0.16035427	1.3	0	1.3	0	0	48.5	0	0	0	20.1	1.7	1.9	3.4	31.8	6.7	18.4	150.5	0	5	0	0	6.9	19.7	0	2.2
2001009	2001	5	13	10.91666667	37.33666667	137.33	100	95	13.58	11.41	15.56	34.14	34.26	33.91	10	0.14369164	4.6	2.6	2	0	0.3	8.6	0	0	0	10.7	0	5	2.1	4.3	2.1	2.1	29.9	3.2	67.4	2.1	0	2.1	3	1.7	35.5
2001010	2001	5	13	12.96666667	37.58666667	137.33	90	85	13.48	12.06	15.42	34.2	34.37	34.02	25	0.1080967	12.1	2.2	0.4	0	0	12.3	0	0	0	7.6	2.8	6.1	1.9	3.8	6.6	3.8	27.5	0	59.6	1	0	1.6	3.9	5.3	48.2
2001011	2001	5	13	16.01666667	37.67	136.9966667	60	55	13.9	12.7	15.88	34.25	34.34	34.11	25	0.29427314	4.2	1.3	0	0.2	0	9.9	0	1.4	0	4.9	0.7	5.6	1.4	1.4	4.2	1.4	17.6	0	69.5	1.4	0	5	5.1	0.4	19.4
2001012	2001	5	13	14.98333333	37.50333333	136.9966667	90	85	12.55	11.36	14.57	34.11	34.23	34.09	10	0.110009104	1.6	0	0.9	0	0	71.6	0	0	0	36.5	26.7	10.8	2.8	12.7	2.8	23.8	36.5	0	16.8	0	0	19.8	6.7	0	7.1
2001013	2001	5	14	7.083333333	37.67	136.6633333	120	115	11.92	10.39	15.02	34.17	34.29	34.01	15	0.30130535	2.6	0.9	0	0	0	67.1	0	0.9	0	8.8	6.2	9.9	2.7	0.9	6.2	3.5	35.3	0	21.2	1.8	0	3.1	10.9	0	4.6
2001014	2001	5	14	8.266666667	37.50333333	136.6633333	120	115	13.68760309	12.23587629	15.60023196	34.22014359	34.38523196	33.91427835	18.56476684	0.16417283	12	2.9	0	0.6	0	14.4	0	1.6	0	25.6	3.2	11.2	0	1.6	27.2	0	46.4	0	110.3	3.2	1.6	5.1	19.4	21.7	28.5
2001015	2001	5	14	9.616666667	37.33666667	136.6633333	100	95	13.81	11.86	16.47	34.19	34.36	33.77	15	0.13972242	6.2	3.9	0.8	1.5	0	20.8	0	0	0	10.4	5.2	1.1	5.2	10.4	13	0	83.2	31.2	109.2	2.6	0	3.7	4.6	119.4	79.6
2001016	2001	5	14	12.4	37.00333333	136.6633333	50	45	14.9	13.75	16.31	34.32	34.37	34.29	15	0.12938161	5.3	1.3	0	0	0	0	0	0	0	7.3	2.4	0	0.8	4.9	1.6	0	3.2	5.7	83.3	0.8	0	1.8	0	8.7	38
2001017	2001	5	14	13.98333333	36.83666667	136.6633333	40	35	15.48	14.33	16.7	34.16	34.31	33.71	10	0.22226897	0	0.3	0	0.6	0.3	0	0	0	0	7.4	0.4	0.4	0	1.4	1	0	1.4	6.7	50.9	2.9	0.4	1.1	0	0	22.4
2001018	2001	5	15	6.683333333	36.50333333	136.33	70	65	14.63	13.5	16.36	34.27	34.36	34.12	20	0.44356978	5.8	1.6	0	0	0	0.6	0	1.1	0	11.5	1.7	0	0	1.7	7	0	15.5	5.2	47.2	3.4	0.6	1.6	1	8.9	13.1
2001019	2001	5	15	9.866666667	36.17	135.9966667	100	95	14.87	14.01	17.28	34.38	34.42	34.32	10	0.114767365	16.4	4.2	0	0	0	0.8	0	2.2	0	9.6	0	0.4	0.4	1.8	15.1	0	5.2	4.8	9.9	2.2	0	18.9	9.5	6.1	49.3
2001020	2001	5	15	11.6	36.00333333	135.83	270	150	13.47	10.72	17.44	34.18	34.43	34.35	15	0.13662657	5.7	4.8	0	0	0	10.4	0	2.8	0	16.1	1.9	1.1	1.9	10.4	21.7	0.9	33.9	17.9	30.2	4.7	0.9	8.7	4.2	6.4	57
2001021	2001	5	15	13.7	35.83666667	135.83	130	125	14.54	12.9	17.74	34.38	34.45	34.23	10	0.14051382	4.2	1.8	0	0	0	0.8	0	5.2	0	22.8	1.5	0.3	2.2	12.5	25.7	2.2	11.8	5.2	15.4	1.5	0.8	12.7	3	1.6	62.3
2001022	2001	5	15	15.15	35.67	135.83	80	75	15.48	14.15	17.95	34.3	34.39	34.07	10	0.16451111	1.8	4	0.2	0	0.2	0	0	6.6	0.6	13.1	1.1	0.2	9.3	4.9	7.1	0	12.6	5.5	38.4	8.8	0.6	4.2	0	1.5	50.4
2001023	2001	5	17	7.55	35.67	135.58	90	85	15.82	14.42	17.05	34.37	34.42	34.31	20	0.1863874	4.6	3.1	0.6	0	5.7	0	2.2	17.5	0	56.8	2.2	0	17.5	8.8	133.3	0	13.1	48.1	80.9	13.1	4.4	2.9	1.1	4	62.8
2001024	2001	5	17	8.95	35.83666667	135.58	200	150	13.78	11.02	17.12	34.28	34.47	34.44	30	0.11963624	3.5	2.6	4.2	0	0	6.9	0	3.2	0	5.3	1.5	4.3	1.5	9.1	31.3	3.8	13.7	19	14.5	3.8	0	15.6	8	0.5	68
2001025	2001	5	17	10.41666667	35.83666667	135.33	120	115	15.33	14.53	17.2	34.44	34.47	34.36	20	0.17231497	2.6	3.1	2.1	0	1.6	0	0.8	3.3	0	9.8	0	0	1.6	5.7	22.8	0.8	4.1	23.6	18.7	14.6	4.1	3	2.1	3.7	36.3
2001026	2001	5	17	11.85	35.67	135.33	70	65	16.33	14.87	17.46	34.25	34.41	34.09	20	0.21396571	1.6	2.4	0	0	3.2	0	0	5	2.4	41.1	0	0	14.5	4.8	16.9	0	46	60.4	154.6	53.1	0	12.6	1.8	0	59.8
2002001	2002	5	10	14.01666667	37.17	137.9966667	170	150	11.72	10.15	14.43	33.93	34.31	33.08	13	0.2229383	2.8	0	0	0	0	22.9	0	0	0	22.9	15.3	0	30.5	106.7	22.9	53.3	952.5	15.3	45.7	0	0	8	50.8	0	13.4
2002002	2002	5	10	16.11666667	37.17	137.6633333	990	150	12.01	10.82	14.86	34.07	34.26	33.49	7	1.4192704	0	0.2	0	0	0	17.5	0	0	0	23.3	0	5.9	23.3	29.2	23.3	192.5	280.1	0	0	5.9	0	2.7	38.3	0	2.7
2002003	2002	5	11	8.183333333	37.003	137.6626667	69	64	12.4	11.59	13.95	33.8	33.99	33.34	11	0.449290536	2.8	3	2.7	0	0	0	0	0	0	28.2	11.3	0	61.9	67.6	5.7	11.3	298.2	0	22.5	0	0	0	122.6	0	8
2002004	2002	5	11	10.85	36.837	137.33	698	150	12.06	10.47	15.15	33.79	34.18	32.7	11	0.3052963	4.4	0	17.5	0	0	2.2	0	0	0	21.9	4.4	0	11	4.4	4.4	6.6	230	0	11	0	0	4.4	61.3	0	2.2
2002005	2002	5	11	13.03333333	36.84016667	137.0833333	336	150	11.93	10.08	14.77	33.75	34.16	32.78	10	0.449290536	3.5	0	15.7	0	0	0	0	0	0	10.6	8	0	2.7	8	2.7	10.6	201.6	0	29.2	0	0	0	40	0	5.2
2002006	2002	5	11	14.63333333	37.01216667	137.0935	104	99	13.18	11.63	14.86	33.8	34.2	33.06	13	1.9901013	0.7	0.6	178.9	2.3	0	9.1	6.8	0	0	27.2	4.5	0	18.1	13.6	4.5	40.8	77	0	11.3	2.3	0	4.5	56.6	0	13.6
2002007	2002	5	12	8.833333333	37.17133333	137.0981667	65	60	13.54	12.57	14.82	33.95	34.22	32.96	9	0.449290536	0.2	0.2	0	0	0	0	0	0	0	12.7	7.6	0	12.7	5.1	15.2	0	58.4	0	35.6	2.5	0	2.5	25.4	0	25.4
2002008	2002	5	12	10.4	37.17	137.33	1230	150	11.71	10.86	14.56	34.01	34.24	32.75	7	0.54609823	0	0	1.3	0	0	0	0	0	0	9.6	7.6	0	9.6	1.9	17.2	7.6	231.4	0	28.7	1.9	0	3.9	23.7	0	0
2002009	2002	5	12	12.1	37.33666667	137.33	100	95	12.87	11.35	14.35	34.11	34.23	33.7	14	0.22048268	0	0.6	51.8	0	0	8	0	0	0	39.9	4	0	0	8	15.9	19.9	346.7	4	55.8	8	0	4	31.9	0	0
2002010	2002	5	12	14.83333333	37.58666667	137.33	90	85	13.32	12.63	14.59	34.19	34.31	33.9	12	0.14436603	17.5	7.6	44.9	0	0	0	0	0	0	24.2	0	17.5	0	3.5	13.8	3.5	265.6	0	113.9	6.9	0	0	3.5	0	24.2
2002011	2002	5	13	7.85	37.50333333	136.9966667	90	85	13.51	12.81	14.88	34.24	34.38	33.94	12	0.16417246	12.1	4	28.8	0	0	0	0	0	0	15.7	21	5.2	10.5	36.7	36.7	5.2	445.8	41.9	125.9	15.7	10.5	7.2	7.2	0	107.8
2002012	2002	5	13	9.416666667	37.67	136.9966667	60	55	13.46	12.35	14.71	34.19	34.28	33.88	10	0.2236417	14.8	3.1	11	0	0	25.6	0	3.7	0	3.7	18.3	7.3	3.7	47.6	22	14.7	183.1	14.7	43.9	14.7	3.7	3.7	22	0	102.5
2002013	2002	5	13	11.01666667	37.67	136.6633333	120	115	12.8	10.69	14.76	33.85	34.31	33.77	12	0.17575589	5.9	4.9	7.4	0	0	53.9	0	0	0	6.4	22.2	6.4	3.2	34.9	25.4	9.5	152.1	9.5	41.2	6.4	0	10.3	35.4	0	35.4
2002014	2002	5	13	12.21666667	37.50333333	136.6633333	120	115	13.09	11.36	15.37	34.19	34.34	33.77	12	0.20667373	3.2	2.5	4.7	0	0	76.5	0	0	0	36.6	16.6	23.3	0	26.6	16.6	6.7	189.6	33.3	46.6	0	0	6.3	29.9	0	78.8
2002015	2002	5	13	13.61666667	37.33666667	136.6633333	100	95	13.97	13.35	15.48	34.24	34.44	33.71	14	0.449290536	9.3	2.9	0	0	0	0	0	0	2.6	31.6	5.3	0	10.5	5.3	5.3	0	158	13.2	94.8	0	0	5.5	0	0	14.7
2002016	2002	5	14	8.8	37.00333333	136.6633333	50	45	14.53	13.97	15.67	34.15	34.38	33.66	13	0.3569132	19.8	3.3	13.1	0	0	0	0	6.5	0	71.8	6.5	0	13.1	52.2	58.7	0	287	13.1	260.9	13.1	0	0	0	84.8	78.3
2002017	2002	5	14	10.95	36.83666667	136.6633333	40	35	14.89	14.25	15.91	34.08	34.34	33.42	10	0.2672616	13.9	6.1	9.3	0	0	0	0	0	0	37.1	9.3	0	4.6	9.3	9.3	0	83.6	18.6	111.4	0	4.6	0	0	13.9	27.9
2002018	2002	5	14	13.65	36.50333333	136.33	70	65	14.82	14.1	16.72	33.94	34.45	33.45	8	0.30460638	8.1	5.7	2	0	0	0	0	2	0	38.6	8.1	0	0	4.1	24.4	0	24.4	20.3	71.1	4.1	0	4.1	4.1	14.2	36.5
2002019	2002	5	15	8.766666667	36.17	135.9966667	100	95	15.02	14.07	16.5	34.36	34.48	34.01	18	0.447668	14.5	6.4	1.6	0	1.6	0	0	4.3	0	13.1	0	0	17.4	4.3	74	0	43.5	152.2	95.7	30.5	4.3	6.5	11.3	54.9	29
2002020	2002	5	15	10.58333333	36.00333333	135.83	270	150	13.87	11.8	16.38	34.34	34.48	34.19	15	0.4650789	6	2.6	0	0	0	0	0	0	0	15.6	0	0	0	2.4	21.6	0	58.8	7.2	36	7.2	0	6	33.6	16.8	12
2002021	2002	5	15	13.41666667	35.83666667	135.83	130	125	15.03	14.04	16.58	34.42	34.5	34.2	12	0.49141514	18.1	6.5	0	0	0	0	2.6	0	0	10.3	2.6	0	5.2	6.5	50.4	0	24.6	9	22	14.2	1.3	18.1	19.4	45.2	55.6
2002022	2002	5	15	15	35.67	135.83	80	75	15.48	14.69	16.18	34.34	34.45	34.17	32	0.61102676	2.6	9.6	5.1	0	2.6	0	7.2	0	0	92.7	21.4	0	7.2	21.4	42.8	0	92.7	71.3	221.1	14.3	7.2	7.6	0	71.3	58.6
2002023	2002	5	16	9.133333333	35.67	135.58	90	85	15.57	14.84	16.87	34.36	34.48	34.16	13	0.4964517	14.1	15.2	10.6	0	0	0	0	0	0	61.1	34	0	40.7	61.1	190.1	6.8	81.4	74.7	108.6	47.5	0	14.1	10.6	147.9	147.9
2002024	2002	5	16	10.63333333	35.83666667	135.58	200	150	14.51	11.69	16.48	34.38	34.49	34.23	18	0.41616964	5.6	5.2	0	0	0	0	0	1.7	0	3.5	0	0	0	6.9	34.7	0	20.8	95.4	45.1	12.1	3.5	4.4	18.5	3.3	25
2002025	2002	5	16	12.08333333	35.83666667	135.33	120	115	15.05	14.1	16.65	34.38	34.48	33.94	15	0.27087894	4.3	7.7	1.4	0	0	0	0	3.2	0	9.5	6.3	0	6.3	9.5	44.4	0	76.1	98.4	73	9.5	0	4.3	10.1	21.6	21.6
2002026	2002	5	16	13.65	35.67	135.33	70	65	15.79	15.06	16.86	34.27	34.46	34.14	12	0.42226148	5.7	4.8	96.2	0	0	0	8.5	8.5	0	48.1	0	0	31.1	5.7	93.4	0	5.7	8.5	67.9	11.3	0	0	0	70.7	152.8
2003001	2003	5	11	14.5	37.17	137.9966667	170	150	10.85	9.66	13.48	33.89	34.11	32.9	11	0.7570158	0	0	0	0	0	27.6	0	0	0	4	0	0	0	27.6	0	51.2	500.3	0	4	0	0	5.4	19	0	16.3
2003002	2003	5	11	16.55	37.17	8	990	150	10.25	8.86	13.12	33.84	34.08	32.4	6	0.9915008	2.9	0	0	0	0	4.9	0	0	0	0	4.9	0	9.7	29.1	0	72.7	334.3	0	9.7	0	0	0	54.7	0	5.6
2003003	2003	5	12	8.066666667	37.003	137.6626667	69	64	12.11	10.4	13.48	33.51	33.96	32.64	9	1.0453006	6.9	0	6.9	0	0	8.6	0	0	0	8.6	0	0	34.3	17.2	0	154.7	739.1	0	51.6	0	0	13.8	13.8	0	41.5
2003004	2003	5	12	10.53333333	36.837	137.33	698	150	10.7	8.78	13.64	33.69	34.08	32.26	10	1.3061162	2.8	0	0	0	0	0	0	0	0	17	2.8	0	14.1	2.8	0	53.7	257.2	0	25.4	0	0	2.8	36.8	0	28.3
2003005	2003	5	12	12.53333333	36.84016667	137.0833333	336	150	10.78	8.85	13.63	33.7	34.08	32.89	19	0.65044695	0	0	15.7	5.3	0	2.6	0	0	0	10.5	2.6	0	26.2	2.6	2.6	31.5	202	0	10.5	0	0	0	49.9	0	0
2003006	2003	5	12	14.01666667	37.01216667	137.0935	104	99	12.41	10.56	13.85	33.45	34.04	32.8	11	0.5379603	0	0	42.6	17	0	6.1	0	0	0	12.1	18.2	0	96.8	6.1	6.1	84.7	550.8	0	12.1	0	0	4.3	68.1	0	38.3
2003007	2003	5	13	7.966666667	37.17133333	137.0981667	65	60	12.6	10.71	14.42	33.59	34.02	33.1	9	0.453405	0	0	602.4	128.5	0	0	4.4	0	0	17.7	13.3	0	44.3	8.9	0	79.7	186	0	53.2	0	0	0	93	0	17.7
2003008	2003	5	13	9.466666667	37.17	137.33	1230	150	10.39	8.36	13.59	33.87	34.12	32.76	14	0.48887798	1.4	0	11.3	1.4	0	4.3	0	0	0	0	0	0	2.2	6.4	0	19.3	229.5	0	6.4	0	0	4.2	12.7	0	5.6
2003009	2003	5	13	10.81666667	37.33666667	137.33	100	95	11.29	9.79	13.88	33.79	34.09	32.38	9	0.36189085	2.3	0	54.5	6.8	0	5.5	0	0	0	0	5.5	0	11.1	11.1	5.5	83	387.5	0	60.9	0	0	13.6	95.5	0	13.6
2003010	2003	5	13	13.15	37.58666667	137.33	90	85	11.65	10.86	13.31	33.98	34.11	33.64	14	0.29548007	0	0.2	51	2.4	0	4.9	0	0	0	4.9	0	0	2.4	2.4	2.4	9.7	182.1	0	82.6	0	0	0	58.3	0	19.4
2003011	2003	5	14	8.033333333	37.50333333	136.9966667	90	85	11.92	10.84	14.12	33.95	34.13	33.48	11	0.2945436	2.7	0	49	0	0	3.8	0	0	0	0	0	0	3.8	3.8	0	7.5	280.1	0	160.6	0	0	0	27.3	0	13.6
2003012	2003	5	14	9.45	37.67	136.9966667	60	55	12.56	10.97	14.38	33.89	34.13	33.37	10	0.39153787	4.1	0	8.2	0	0	10	0	0	0	39.7	0	0.3	10	10	0	10	784.4	0	615.6	0	0	0	58	0	28.6
2003013	2003	5	14	11.15	37.67	136.6633333	120	115	11.96	10.38	14.43	34.22	34.3	34.19	10	0.15850006	0	0.3	0	0	0	52.3	0	0	0	7.7	3.1	0	3.1	7.7	3.1	12.3	50.7	0	27.7	0	0	5.1	54.4	0	5.9
2003014	2003	5	14	12.45	37.50333333	136.6633333	120	115	11.77	10.48	14.39	34.13	34.26	33.82	7	0.24677101	3.7	0.5	0	0	0	20.3	0	0	0	6.8	3.4	3.4	16.9	10.1	3.4	30.4	246.8	0	50.7	0	0	7.3	139.2	0	11
2003015	2003	5	14	13.63333333	37.33666667	136.6633333	100	95	11.86	10.78	14.91	34.01	34.19	33.34	8	0.26997456	0	0.4	10.6	0	0	0	0	0	0	4.2	0	0	0	0	6.3	2.1	198.6	0	109.9	0	0	0	25.4	0	2.1
2003016	2003	5	15	8.733333333	37.00333333	136.6633333	50	45	12.49	11.55	15.06	33.92	34.08	33.52	9	0.2876197	4	0	12	12	0	0	4	0	0	8	8	0.3	8	12	0	0	244.7	0	328.9	0	0	4	4	0	4
2003017	2003	5	15	10.45	36.83666667	136.6633333	40	35	13.69	12.95	15.41	33.81	34.26	33.51	7	0.53233093	0	2.9	26	0	0	2.9	0	0	2.9	8.7	0	0	11.6	5.8	0	0	52	0	219.5	0	0	17.3	8.7	0	17.3
2003018	2003	5	15	13.3	36.50333333	136.33	70	65	13.57	12.32	15.19	34.2	34.39	33.53	16	0.27285087	6.4	4.1	314	0	0	3.2	3.2	0	0	83.3	16	0	38.5	12.8	28.8	16	102.5	0	310.8	3.2	0	3.2	19.2	0	92.9
2003019	2003	5	16	8.233333333	36.17	135.9966667	100	95	13.86	12.34	15.64	34.32	34.5	34	20	0.15867275	1.7	5.5	35.5	0	0	0	6.6	19.7	0	68.9	3.3	0	13.1	6.6	22.9	0	118.1	3.3	154.1	0	0	6.8	22	0	30.4
2003020	2003	5	16	10.03333333	36.00333333	135.83	270	150	12.94	9.61	15.79	34.23	34.47	33.96	15	0.17572014	1.2	2.6	5.9	0	0	9.4	0	6.2	0	40.5	3.1	0	3.1	6.2	9.4	0	53	0	199.5	0	0	4.7	17.7	0	16.6
2003021	2003	5	16	12.06666667	35.83666667	135.83	130	125	12.73	10.93	15.59	34.33	34.48	34.19	24	0.22663207	3.3	1.1	37.7	0	0	8.9	1.1	5.6	0	8.9	7.8	2.2	5.6	7.8	3.3	0	41	0	67.7	0	0	7.8	14.4	0	6.7
2003022	2003	5	16	13.63333333	35.67	135.83	80	75	13.96	12.79	15.69	34.23	34.4	33.89	12	0.1299626	2.1	8.3	2.1	0	0	0	12.3	0	0	81.9	8.2	0	4.1	8.2	28.7	0	36.8	0	368.4	4.1	0	8.4	0	0	20.9
2003023	2003	5	17	8.6	35.67	135.58	90	85	14.14	13.11	16.01	34.43	34.5	34.09	11	0.28471714	7.5	0	7.5	0	2.5	0	0	0	0	14.9	0	0	2.5	7.5	114.3	0	39.7	2.5	288.1	7.5	2.5	0	24.8	0	17.4
2003024	2003	5	17	10.3	35.83666667	135.58	200	150	12.67	9.63	15.53	34.34	34.46	34.19	17	0.3125049	1.3	0.6	24.5	0	0	2.3	2.3	2.3	0	37	6.9	0	9.3	4.6	37	0	44	0	85.6	2.3	0	3.9	25.8	0	18.1
2003025	2003	5	17	11.95	35.83666667	135.33	120	115	13.91	12.7	16.2	34.46	34.52	34.15	13	0.30414048	3.4	0.4	0	0	0	0	3.4	1.7	0	16.8	3.4	0	0	3.4	60.6	0	8.4	0	144.9	0	0	0	21.9	0	11.8
2003026	2003	5	17	13.45	35.67	135.33	70	65	15	13.99	15.93	34.33	34.5	34.12	25	0.3062364	3.4	8.1	0	0	0	0	33	13.4	0	92.4	0	0	19.8	13.2	105.6	0	33	6.6	330.2	0	0	20.1	6.7	0	130.8
2004001	2004	5	9	10.05	37.17	137.9966667	170	150	11.91	11.22	13.81	34.05	34.21	33.61	14	0.6122133	10.9	0	13.6	0	0	10.9	0	0	0	16.4	19.1	5.5	27.3	8.2	2.7	5.5	305.6	0	51.8	0	0	2.9	57.3	0	13.6
2004002	2004	5	9	12.2	37.17	137.6633333	990	150	11.66	10.44	13.55	33.96	34.2	33.36	10	0.6886107	2.5	0.2	5	5	0	0	0	0	0	30.3	5	2.5	17.7	0	5	2.5	421.1	0	80.7	0	0	7.6	35.3	0	15.1
2004003	2004	5	9	13.65	37.003	137.6626667	69	64	12.23	11.81	12.77	33.87	34.08	33.62	25	7.668736	13.9	3.1	75.1	0	0	8.3	5.6	0	0	41.7	5.6	0	89	5.6	5.6	8.3	264.1	0	172.4	0	0	11.1	22.2	0	55.6
2004004	2004	5	9	16.06666667	36.837	137.33	698	150	11.88	10.56	14.08	34	34.28	32.95	14	2.9444103	4.5	0	56.2	1.3	0	2.6	0	0	0	9.6	7	0	15.3	1.3	3.8	0.6	165.5	0	33.9	0	0	0	10.2	0	3.2
2004005	2004	5	10	6.483333333	36.84016667	137.0833333	336	150	12.15	10.66	14.05	34.05	34.16	33.88	12	0.972436	2.7	1.7	50	2.7	0	1.4	0	0	1.4	27	0	0	51.4	2.7	2.7	2.7	82.5	0	52.7	0	0	2.7	5.4	0	18.9
2004006	2004	5	10	8.15	37.01216667	137.0935	104	99	12.21	10.6	14.24	34.17	34.37	33.95	12	0.449290536	1.4	0.2	620.1	6.9	0	1.4	0	0	0	6.9	2.8	0	31.9	1.4	0	0	59.7	1.4	45.8	0	0	2.8	15.3	0	13.9
2004007	2004	5	10	9.783333333	37.17133333	137.0981667	65	60	13.33	12.46	14.24	33.49	34.25	34.11	17	0.909807	0	9.6	1645.9	24	4	0	8	0	0	36	0	0	263.7	8	4	0	28	0	175.8	0	0	0	40	0	71.9
2004008	2004	5	10	11.35	37.17	137.33	1230	150	11.41	10.17	14.12	34.01	34.24	32.26	7	0.8609976	6.2	0.2	33.3	0	0	2.1	0	0	0	19.8	5.2	0	10.4	1	1	2.1	210	0	32.2	0	0	3.1	19.8	0	6.2
2004009	2004	5	10	12.8	37.33666667	137.33	100	95	13.59	11.5	14.68	34.35	34.48	34.27	22	0.49689266	1.8	0.2	887.9	30.3	0	3.6	0	0	21.4	103.4	0	0	37.4	8.9	10.7	1.8	10.7	0	76.7	0	0	1.8	25	3.6	53.5
2004010	2004	5	11	11.35	37.58666667	137.33	90	85	14.18	13.46	14.77	34.49	34.57	34.38	28	0.5399592	6.9	1	1330.3	6.9	0	0	6.9	3.4	3.4	123.8	0	0	72.2	3.4	17.2	17.2	72.2	0	0	0	0	0.2	61.9	0	72.2
2004011	2004	5	11	15.81666667	37.67	136.9966667	60	55	14.37	13.5	14.74	34.53	34.61	34.47	55	0.17569216	0	0.8	353.4	1	0	0	0	0	2	39.3	2	0	34.3	2	6.1	3	14.1	0	54.5	0	1	0	17.1	0	19.2
2004012	2004	5	11	14.71666667	37.50333333	136.9966667	90	85	13.91	13.71	14.35	34.51	34.59	34.43	23	0.22763513	0	1.2	189.6	1.7	0	1.7	3.3	0	3.3	46.5	6.6	0	91.3	6.6	16.6	5	43.1	0	141	0	0	0	29.9	0	16.6
2004013	2004	5	12	9.65	37.67	136.6633333	120	115	12.79	11.28	14.33	34.47	34.53	33.87	34	0.2280218	1.4	5.7	197.9	2.7	0	9.5	0	0	2.7	17.6	8.1	0	35.2	14.9	9.5	4.1	97.6	8.1	55.6	2.7	0	5.9	32.5	0	14.9
2004014	2004	5	12	10.95	37.50333333	136.6633333	120	115	13.08	11.69	14.94	34.42	34.62	34.28	15	0.93704677	0	0.6	170.2	0	0	6.5	3.2	0	0	30.8	11.4	0	71.3	17.8	22.7	1.6	68.1	0	71.3	0	0	3.2	30.8	0	25.9
2004015	2004	5	12	12.25	37.33666667	136.6633333	100	95	14.39	13.73	15.87	34.44	34.62	34.1	12	1.3492963	0	5.7	304	9.6	3.8	0	0	0	9.6	122.4	21	0	120.5	21	21	0	36.3	0	200.8	0	1.9	0	126.2	0	53.5
2004016	2004	5	13	6.95	37.00333333	136.6633333	50	45	14.87	14.34	16.03	33.76	34.55	33.66	13	0.49438035	0	10.4	96.2	1.7	1.7	1.7	3.3	0	21.6	51.4	5	0	21.6	5	1.7	0	3.3	0	270.4	0	0	0	5	1.7	41.5
2004017	2004	5	13	8.383333333	36.83666667	136.6633333	40	35	15.12	14.48	16.08	34.16	34.51	33.54	8	0.35689107	0	14.5	9.5	4.7	2.4	0	2.4	0	9.5	186.8	2.4	0	4.7	2.4	14.2	0	21.3	0	153.7	0	0	0	23.7	0	37.8
2004018	2004	5	13	13.56666667	36.50333333	136.33	70	65	15.64	15.06	16.48	34.58	34.68	34.23	15	0.22711226	0	2.2	54.4	3.9	0	0	3.9	3.9	0	403.7	15.5	0	7.8	3.9	7.8	0	62.1	3.9	287.3	3.9	0	0	15.5	3.9	54.4
2004019	2004	5	14	9.016666667	36.17	135.9966667	100	95	15.42	14.95	16.55	34.67	34.72	34.55	19	0.41036525	3.7	1	62.5	0	0	0	7.4	0	0	102.9	7.4	3.7	3.7	11	25.7	0	18.4	36.7	698	11	0	0	31.1	0	22
2004020	2004	5	14	10.83333333	36.00333333	135.83	270	150	15.1	12.72	16.55	34.69	34.76	34.63	20	0.45900115	5.1	2.7	12.8	0	0	0	2.6	2.6	2.6	104.8	5.1	0	0	2.6	76.7	0	63.9	94.6	322	5.1	10.2	0	15.3	0	10.2
2004021	2004	5	14	12.5	35.83666667	135.83	130	125	15.47	14.24	17.18	34.68	34.75	34.42	16	0.5242012	0	10.2	2.5	0	0	5	2.5	0	0	110	0	0	0	0	17.5	7.5	5	20	195	0	10	2.5	20.1	2.5	22.5
2004022	2004	5	14	14.6	35.67	135.83	80	75	15.93	14.99	17.02	34.63	34.75	34.27	15	2.0593235	2.4	9.7	0	0	0	0	7.3	0	0	151.3	4.9	0	2.4	2.4	41.5	0	0	34.2	0	0	12.2	5.2	0	0	19.5
2004023	2004	5	15	8.133333333	35.67	135.58	90	85	16.47	15.42	17.16	34.62	34.72	34.55	41	1.3988312	0	4.6	0	0	4.5	0	0	0	0	197.2	0	0	0	0	80.7	0	0	9	112.1	9	22.4	4.6	0	0	4.5
2004024	2004	5	15	10.08333333	35.83666667	135.58	200	150	15.24	13.64	17.04	34.7	34.76	34.55	22	0.756873	4.1	0.2	16.4	8.2	0	0	2	0	0	32.7	4.1	0	2	2	36.8	0	0	32.7	0	0	0	0	26.6	0	22.5
2004025	2004	5	15	11.53333333	35.83666667	135.33	120	115	16.36	15.05	17.52	34.65	34.76	34.38	33	0.9949115	0	1.8	0	0	0	0	0	0	0	61.9	1.7	0	6.7	0	30.1	0	0	23.4	120.4	10	10	0	7.1	1.7	3.4
2004026	2004	5	15	13.63333333	35.67	135.33	70	65	16.76	15.16	17.45	34.59	34.7	34.53	27	2.612791	0	1.2	0	0	2.5	0	0	0	0	77.9	0	0	0	0	5	0	0	15.1	27.6	2.5	2.5	0	5	0	0
2005001	2005	5	14	10.38333333	37.17	137.9966667	170	150	11.49	10.22	13.63	34.14	34.36	33.53	11	0.45715088	2.4	0	9.7	4.8	0	4.8	0	2.4	0	12.1	57.9	0	0	2.4	12.1	4.8	180.9	0	0	0	0	2.4	57.9	0	0
2005002	2005	5	14	12.46666667	37.17	137.6633333	990	150	11.55	10.43	13.52	34.26	34.37	33.41	9	0.38490564	0	0	0	0	0	12	0	0	0	0	57.7	0	4.8	9.6	0	7.2	96.1	0	16.8	0	0	4.8	7.2	0	0
2005003	2005	5	14	13.9	37.003	137.6626667	69	64	12.19	11.01	13.99	33.9	34.2	33.12	6	0.08043271	4.8	0	18.8	0	0	18.8	0	0	4.7	14.1	141.2	0	9.4	4.7	0	0	635.4	0	9.4	0	0	9.4	164.7	0	4.7
2005004	2005	5	14	16.28333333	36.837	137.33	698	150	11.37	9.84	13.94	34.01	34.21	33.66	23	0.26836926	0	0	0	0	0	0	0	0	0	2.9	23.3	0	2.9	0	0	5.8	183.2	0	5.8	0	0	0	14.9	0	0
2005005	2005	5	15	6.65	36.84016667	137.0833333	336	150	11.19	9.33	14.27	33.97	34.3	33.07	12	0.25150388	0	0	1.1	0.5	0	0	0	0	0	0	1.5	0	0	0	1.5	1.5	85.2	0	5.9	0	0	1.6	8.9	0	0.5
2005006	2005	5	15	8.25	37.01216667	137.0935	104	99	11.73	10.17	14.56	34.02	34.21	33.3	9	0.15735099	3.2	0	1.6	0	0	1.6	0	0	1.6	6.3	11	0	6.3	3.2	0	6.3	160.4	0	11	0	0	0	17.3	0	6.3
2005007	2005	5	15	9.716666667	37.17133333	137.0981667	65	60	12.95	11.4	14.34	34.01	34.21	33.57	6	0.17844874	14.5	7.3	10.8	0	0	0	0	0	0	7.2	25.3	0	21.7	7.2	10.8	0	227.6	0	36.1	0	0	14.5	7.5	0	108.4
2005008	2005	5	15	11.23333333	37.17	137.33	1230	150	11.17	10.22	14.69	34.04	34.27	33.03	11	0.43292803	0	0	6.3	0	0	0	0	0	0	0	102	0	10.2	45.9	0	5.1	494.6	0	5.1	0	0	0	176.4	0	2.1
2005009	2005	5	15	12.65	37.33666667	137.33	100	95	11.81	10.04	14.38	34.14	34.26	33.67	9	0.15193374	1.6	0.8	2.7	0	0	6.3	0	0	1.6	11.1	12.6	0	4.7	0	3.2	0	56.8	0	39.5	0	0	2	23.5	0	18.6
2005010	2005	5	16	10.93333333	37.58666667	137.33	90	85	13.02	11.44	14.45	34.42	34.48	34.37	20	0.13807987	8.2	2.3	0	0	0	2.1	0	0	0	12.3	10.2	0.3	0	0	4.1	0	32.7	0	83.9	2.1	0	0	2.1	0	18.4
2005011	2005	5	16	15.08333333	37.67	136.9966667	60	55	13.3	12	14.92	34.43	34.5	34.32	10	0.098953225	0	9.1	0	0	0	0	0	0	0	2.1	14.9	0.5	0	8.5	8.5	0	50.9	0	95.5	0	0	0.5	2.1	0	34
2005012	2005	5	16	13.95	37.50333333	136.9966667	90	85	13.05	12.14	14.03	34.45	34.49	34.47	13	0.12833944	0	1.3	0	0	0	3.5	0	0	0	21.2	31.8	7.6	14.1	3.5	10.6	35.3	187.1	0	84.7	0	0	0.7	3.6	0	105.9
2005013	2005	5	17	9.316666667	37.67	136.6633333	120	115	13.26	12.1	14.97	34.49	34.61	34.34	23	0.15199918	7.3	3.8	0	0	0	5.7	0	3.8	0	15.1	13.2	1.9	0	1.9	30.1	1.9	49	0	77.2	1.9	0	2.6	7.3	0	60.8
2005014	2005	5	17	10.55	37.50333333	136.6633333	120	115	13.53	12.39	15.25	34.57	34.66	34.45	27	0.13001862	0.8	4	0	0	0	7	0	0	0	0	27.8	0	4.6	0	32.5	2.3	65	0	74.2	0	2.3	3.9	4.5	0	24.9
2005015	2005	5	17	11.81666667	37.33666667	136.6633333	100	95	13.71	12.52	15.38	34.49	34.57	34.31	8	0.15375672	7.8	3.3	1.6	0	0	0	0	5.8	0	51.4	20	0	0	0	28.6	0	8.6	0	102.7	2.9	2.9	0	1.6	0	31.1
2005016	2005	5	17	16.25	37.00333333	136.6633333	50	45	14.4	13.17	15.2	34.44	34.61	34.13	22	0.17813216	11	6	0	0	0	0	0	38.4	0	89.6	25.6	0	0	0	140.8	0	127.9	0	742.1	0	0	5.7	0.2	0	209
2005017	2005	5	17	17.46666667	36.83666667	136.6633333	40	35	14.79	13.68	15.84	34.33	34.55	34.15	9	0.25513986	10.9	0.5	0	0	0	0	0	0	0	47.3	25.5	0	7.3	3.6	21.8	0	0	3.6	145.6	3.6	3.6	3.6	3.6	0	98.3
2005018	2005	5	19	10.26666667	36.50333333	136.33	70	65	14.96	14.27	15.95	33.92	34.63	34.18	21	0.2368124	5.2	12	0	0	0	0	0	0	3.7	51.6	14.7	0	0	0	29.5	0	18.4	0	213.6	3.7	3.7	1.3	0	0	57.3
2005019	2005	5	20	7.733333333	36.17	135.9966667	100	95	15.29	13.78	16.12	34.6	34.67	34.56	49	0.20675603	2	2	2	0	0	0	0	2	0	2	14	0	0	2	48.1	0	0	18	120.2	0	14	8	72.1	0	0
2005020	2005	5	20	9.85	36.00333333	135.83	270	150	14.51	12.25	16.4	34.56	34.66	34.39	28	0.18782458	23.7	7.5	0	0	0	0	9.1	0	0	31.8	4.5	0	0	0	59	0	27.2	36.3	299.4	4.5	18.2	0	9.5	0	49.8
2005021	2005	5	20	11.7	35.83666667	135.83	130	125	14.5	13.68	16.13	34.59	34.67	34.49	24	0.15524812	7.8	6.2	1.6	0	0	0	0	0	0	2.6	23.2	2.6	0	0	56.8	0	12.9	2.6	183.2	0	0	1.6	3.1	0	7.8
2005022	2005	5	20	14.58333333	35.67	135.83	80	75	15.7	15.02	16.48	34.49	34.59	34.39	22	0.17585066	10.3	72.5	0	0	0	0	9.9	9.9	0	128.7	0	0	0	0	148.5	0	0	9.9	524.6	19.8	19.8	15.5	5.2	0	175.2
2005023	2005	5	21	8.116666667	35.67	135.58	90	85	15.56	14.85	16.57	34.61	34.66	34.56	14	0.18257572	3.4	1.3	0	0	0	0	0	2.1	0	2.1	4.2	0	0	0	54.2	0	4.2	37.5	75	10.4	16.7	0	3.4	5.7	2.3
2005024	2005	5	21	10.41666667	35.83666667	135.58	200	150	14.93	12.62	16.69	34.61	34.66	34.62	19	0.09927372	5.9	2.6	0	0	0	0	0	0	0	6.4	0	0	0	0	34.1	0	4.3	14.9	102.2	6.4	38.3	0	13.1	1.2	9.5
2005025	2005	5	21	12.28333333	35.83666667	135.33	120	115	13.96	11.14	16.37	34.55	34.64	34.48	14	0.22265352	1.5	3.4	0	0	0	0	0	0	0	1.5	10.6	0	0	0	4.5	0	8.3	3.8	37.8	0	0.8	0.8	6.8	0	8.3
2005026	2005	5	21	14.63333333	35.67	135.33	70	65	16.07	15.29	17.54	34.52	34.62	34.4	8	0.1841895	0	4.2	0	0	1.5	0	0	0	0	7.5	1.5	0	0	3	0	10.5	0	9	79.3	1.5	1.5	1.6	0	0	18
2006001	2006	5	13	10.4	37.17	137.9966667	170	150	10.67	9.58	13.98	34.18	34.38	33.74	7	1.6072887	0	0	0	0	0	48.7	0	0	0	0	31.3	3.7	13.9	13.9	3.5	59.2	87	0	45.3	3.5	0	11.4	171.3	0	37.1
2006002	2006	5	13	12.5	37.17	137.6633333	990	150	10.86	9.54	13.82	34.14	34.27	33.61	14	0.7002415	0	0	4.4	0	0	4.4	0	0	0	0	71.1	0	22.2	4.4	8.9	8.9	151.1	4.4	115.5	0	0	0	62.2	0	8.9
2006003	2006	5	13	13.85	37.003	137.6626667	69	64	11.36	10.29	12.2	34.11	34.33	33.89	15	0.35605204	0	0	0	0	0	6.8	0	0	0	0	88.4	0.9	6.8	40.8	27.2	20.4	299.2	0	61.2	0	0	5.5	99.3	0	16.6
2006004	2006	5	13	16.16666667	36.837	137.33	698	150	10.59	9.42	13.53	33.93	34.31	31.81	7	0.94983727	0	3.5	0	0	0	17.1	0	0	0	4.3	81	0	8.5	8.5	0	51.2	179.1	0	38.4	0	0	31.3	62.6	0	0
2006005	2006	5	14	6.6	36.84016667	137.0833333	336	150	10.92	9.29	14.18	33.96	34.2	32.61	15	0.15769899	0	0	4.7	4.7	0	0	0	0	0	17.4	109.9	0	23.1	11.6	0	28.9	219.8	17.4	86.8	0	0	0	23.3	0	4.7
2006006	2006	5	14	8.35	37.01216667	137.0935	104	99	11.41	9.45	13.97	34.02	34.19	33.25	7	0.31967065	0	0	0	0	0	0	0	0	0	0	148.8	0	11.4	28.6	0	57.2	240.3	0	108.7	0	0	0	81.1	0	19.1
2006007	2006	5	14	9.866666667	37.17133333	137.0981667	65	60	12.59	11.09	13.75	33.98	34.47	33.14	12	0.1915127	0	0	61.5	41	0	0	13	0	0	51.9	142.7	0	142.7	0	0	51.9	90.8	0	622.8	0	0	20.5	143.4	0	0
2006008	2006	5	14	11.4	37.17	137.33	1230	150	11.18	9.67	14.07	34.11	34.46	32.8	15	0.7079768	0	0	0	0	0	5.5	0	0	0	5.5	98.7	5.5	11	16.4	0	54.8	175.4	0	109.6	0	0	13	266.5	0	0
2006009	2006	5	14	12.78333333	37.33666667	137.33	100	95	11.71	9.38	13.97	34.09	34.28	33.15	20	0.28745392	0	0	12.1	0	0	16.5	16.5	0	0	16.5	57.6	0	65.9	8.2	0	65.9	131.7	8.2	271.7	0	0	18.2	115	0	48.4
2006010	2006	5	15	11.1	37.58666667	137.33	90	85	12.9	12.13	14.7	34.29	34.41	33.99	7	0.44036835	0	13.5	0	0	0	0	0	0	0	0	60	0	20	0	60	0	159.9	0	509.6	0	10	20.3	6.8	0	20.3
2006011	2006	5	15	15.3	37.50333333	136.9966667	90	85	13.19	12.43	14.86	34.26	34.47	33.91	13	0.38844022	0	0	7.3	0	0	0	0	0	0	9.1	81.4	0	36.2	18.1	45.2	0	72.4	0	461.5	0	0	0	48	0	20.6
2006012	2006	5	15	14.2	37.67	136.9966667	60	55	13.4	12.23	14.75	34.35	34.52	34.23	14	0.41181773	0	15.7	0	0	0	10.2	0	0	0	40.7	71.3	0	71.3	61.1	50.9	40.7	173.1	40.7	264.7	10.2	10.2	0	51.3	0	139.1
2006013	2006	5	16	9.633333333	37.67	136.6633333	120	115	13.07	12.21	15.08	34.44	34.55	34.2	17	0.40187666	0	6.7	16.6	0	0	0	0	16.6	0	11	16.6	0	49.7	16.6	66.3	0	55.2	11	287.2	5.5	11	0	104.9	0	38.7
2006014	2006	5	16	10.93333333	37.50333333	136.6633333	120	115	13.2	12.42	15.1	34.47	34.54	34.32	19	0.41078782	3.2	11.1	0	0	0	0	4.3	4.3	0	8.7	30.3	4.3	30.3	26	77.9	0	47.6	0	155.8	8.7	13	9.4	56.7	0	59.8
2006015	2006	5	16	12.2	37.33666667	136.6633333	100	95	13.68	12.94	15.79	34.21	34.49	33.11	9	0.21278651	6.5	1.6	12.9	0	0	0	0	22.2	0	11.1	33.3	0	22.2	0	44.4	0	33.3	100	1210.5	0	0	0	38.8	0	90.6
2006016	2006	5	17	6.683333333	37.00333333	136.6633333	50	45	14.15	13.13	15.53	34.3	34.5	33.89	11	0.59859675	0	26.2	0	0	0	0	12.8	0	0	51.3	51.3	0	25.7	0	243.7	0	0	38.5	756.9	0	38.5	2	66	0	44
2006017	2006	5	17	8.033333333	36.83666667	136.6633333	40	35	14.46	13.48	15.76	34.18	34.4	33.86	9	0.9891188	13.7	17.5	82.2	0	0	0	0	17.8	0	35.6	53.4	1.4	71.2	0	17.8	0	17.8	53.4	1015.1	0	89	0.5	13.7	0	41.1
2006018	2006	5	17	12.88333333	36.50333333	136.33	70	65	14.47	13.58	15.79	34.29	34.53	33.65	10	0.6926961	0	26.8	22	0	0	0	34.7	17.3	0	17.3	69.3	17.3	17.3	0	138.6	0	225.3	121.3	1680.7	0	0	0.3	0	0	77
2006019	2006	5	18	8.483333333	36.17	135.9966667	100	95	14.39	13.65	15.52	34.48	34.55	34.37	26	0.46832055	0	0.4	0	0	0	0	0	3.9	0	0.2	3.8	0	11.4	15.2	22.8	0	34.2	22.8	220.5	0	7.6	7.8	54.3	0	30.4
2006020	2006	5	18	10.26666667	36.00333333	135.83	270	150	13.84	11.63	15.5	34.43	34.55	34.28	13	0.38799077	0	24.6	3	0	3	0	0	9.4	0	0	37.4	0	4.7	14	74.9	0	42.1	23.4	149.7	4.7	14	0	196.6	0	33.3
2006021	2006	5	18	11.9	35.83666667	135.83	130	125	14.18	13.34	15.53	34.47	34.55	34.33	19	0.61882657	0	36.9	4.6	0	0	0	0	0	0	12.8	0	0	12.8	0	57.6	0	76.8	76.8	345.4	0	19.2	9.9	64.6	0	32.3
2006022	2006	5	18	14	35.67	135.83	80	75	14.5	13.48	15.77	34.33	34.51	34.17	15	0.5552072	0	48.7	9.5	0	9.5	0	0	0	0	73	14.6	14.6	14.6	14.6	43.8	0	14.6	43.8	1547.2	0	14.6	0.2	0	0	47.7
2006023	2006	5	19	8.1	35.67	135.58	90	85	14.79	13.98	16.03	34.41	34.54	34.05	13	0.58529556	5.3	55.3	10.6	0	0	0	0	0	0	94.2	7.9	0	15.7	0	212	0	23.6	62.8	212	0	31.4	0.3	16	0	69.1
2006024	2006	5	19	10.05	35.83666667	135.58	200	150	13.83	12.02	15.84	34.52	34.57	34.32	16	0.42568526	2.7	18.9	0	0	0	0	0	4	0	11.9	59.3	0	4	4	90.9	0	11.9	47.4	169.9	4	7.9	13.4	45.2	0	34.5
2006025	2006	5	19	11.53333333	35.83666667	135.33	120	115	14.54	13.78	16	34.48	34.57	34.06	12	0.44033575	5.5	65.7	0	0	0	0	0	8.9	0	35.5	26.6	0	0	17.7	124.2	0	17.7	88.7	621	0	44.4	11.1	158	0	43.6
2006026	2006	5	19	13.81666667	35.67	135.33	70	65	15.01	14.06	16.71	34.21	34.45	33.55	9	0.0840368	0	19.3	0	0	0	0	6.9	6.9	0	96.9	6.9	0	0	0	48.4	0	0	48.4	519	0	48.4	12.1	0	0	35.4
2007001	2007	5	14	6.033333333	37.17	137.9966667	170	150	12.51	11.15	13.94	34.1	34.24	33.89	37	0.4045878	0	4.1	0	0	0	0	0	0	0	88.4	13.6	0	6.8	0	0	0	217.5	6.8	190.3	0	0	0	16.5	0	4.1
2007002	2007	5	14	8.116666667	37.17	137.6633333	990	150	12.32	11.23	13.49	34.18	34.35	34.1	56	0.34634408	11.5	2.4	0	0	0	7.1	0	0	0	3.5	38.9	0	0	7.1	0	0	120.4	10.6	77.9	0	0	0	6.9	0	4.6
2007003	2007	5	14	9.65	37.003	137.6626667	69	64	13.99	12.92	14.83	33.82	34.17	33.29	29	0.44125324	0	0	9	0	0	0	13.5	0	0	148.6	202.6	0	67.6	0	0	0	175.6	0	513.4	0	0	27	72.1	0	99.1
2007004	2007	5	14	12.13333333	36.837	137.33	698	150	12.75	11.22	14.41	34.06	34.25	34.19	47	0.4550586	10.2	14.4	0	0	0	0	0	0	0	106.4	100.8	0	22.4	0	11.2	5.6	229.6	0	100.8	0	0	0	99.3	0	64.8
2007005	2007	5	14	13.91666667	36.84016667	137.0833333	336	150	13.09	11.05	15.06	34.2	34.33	33.88	17	0.3892421	0	0.9	5.3	0	0	0	5.9	0	0	53	141.4	0	23.6	0	0	0	58.9	5.9	247.5	0	0	5.3	48	0	5.3
2007006	2007	5	14	15.58333333	37.01216667	137.0935	104	99	13.05	11.21	14.93	34.15	34.31	34.21	17	0.449290536	0	27	0	0	0	0	0	0	0	49	40.8	0	16.3	0	8.2	0	122.5	32.7	465.6	0	0	0	91	0	13
2007007	2007	5	14	17.05	37.17133333	137.0981667	65	60	14.21	13.39	15.02	34.15	34.31	34.09	21	0.119590856	0	36.2	21.2	0	0	13.4	0	0	0	307.6	240.7	0	26.8	0	13.4	0	40.1	13.4	468.1	0	0	0	45.7	0	42.5
2007008	2007	5	14	18.53333333	37.17	137.33	1230	150	12.38	11.18	14.63	33.97	34.21	34.17	18	0.3278501	16.7	0	29.2	4.2	0	0	0	0	0	21.8	94.3	0	21.8	0	7.3	7.3	362.6	14.5	195.8	0	0	4.2	91.7	0	12.5
2007009	2007	5	15	5.733333333	37.33666667	137.33	100	95	14.42	13.97	14.68	34.35	34.39	34.36	85	0.3174599	0	20.6	199.4	151.3	6.9	0	0	0	0	40.6	162.3	0	32.5	8.1	24.3	0	56.8	0	292.1	0	0	6.9	103.1	0	96.3
2007010	2007	5	15	11.98333333	37.58666667	137.33	90	85	14.64	14.02	15.08	34.33	34.44	34.31	55	0.30584964	0	111.1	186.4	103.6	6.9	0	16.5	0	0	33.1	115.7	0	33.1	0	41.3	0	123.9	41.3	437.9	0	0	0	89.8	27.6	27.6
2007011	2007	5	15	16.65	37.50333333	136.9966667	90	85	15	14.56	15.25	34.39	34.49	34.46	65	0.24996293	9.6	33.6	28.8	4.8	0	0	6.6	6.6	0	59.4	217.8	0	13.2	13.2	19.8	0	6.6	13.2	336.7	0	0	0	9.6	24	9.6
2007012	2007	5	15	15.51666667	37.67	136.9966667	60	55	14.98	13.94	15.35	34.47	34.55	34.53	46	0.33997908	0	19.7	0	0	6.7	8.4	8.4	42	0	579.1	109.1	0.5	8.4	0	42	0	0	8.4	58.8	0	0	55.8	0	6.7	94
2007013	2007	5	16	8.583333333	37.67	136.6633333	120	115	14.16	12.72	15.42	34.43	34.56	34.53	39	0.3779079	12	28.4	0	0	0	0	13	13	13	117.2	104.2	0	6.5	0	45.6	0	117.2	13	162.7	0	19.5	4	44.1	0	28
2007014	2007	5	16	9.783333333	37.50333333	136.6633333	120	115	14.67	14.02	15.57	34.48	34.54	34.54	32	0.37927872	6.9	28.4	27.7	13.8	0	0	15.7	0	0	86.2	86.2	0	0	0	31.4	0	47	23.5	501.7	7.8	0	0	13.8	0	0
2007015	2007	5	16	11.03333333	37.33666667	136.6633333	100	95	15.15	14.52	16.01	34.43	34.5	34.26	35	0.20831028	11	12.2	40.2	3.7	0	0	9.7	0	9.7	115.8	53.1	0	24.1	4.8	48.3	0	14.5	9.7	231.6	0	0	3.7	14.6	0	87.7
2007016	2007	5	16	15.76666667	37.00333333	136.6633333	50	45	15.57	14.8	16.28	34.31	34.43	34.21	29	0.33106375	0	62	26.6	6.7	0	0	75.8	0	7.6	182	30.3	0	7.6	0	7.6	0	7.6	7.6	538.5	0	0	0	79.8	0	99.8
2007017	2007	5	16	17.11666667	36.83666667	136.6633333	40	35	16.01	15.14	16.3	34.17	34.36	33.86	33	0.40891722	0	19.4	0	0	2.9	0	196	0	0	7.3	7.3	0	0	3.6	3.6	0	0	0	50.8	0	0	0	14.7	0	0
2007018	2007	5	18	6.85	36.50333333	136.33	70	65	16.05	15.83	16.06	34.47	34.51	34.46	72	0.47843087	0	14.8	3.6	3.6	54.3	0	8.1	0	16.2	44.6	36.5	0	12.2	0	24.3	0	8.1	24.3	174.3	0	0	0	3.6	0	14.5
2007019	2007	5	18	13.41666667	36.17	135.9966667	100	95	15.88	15.51	16.27	34.55	34.58	34.54	58	0.7788913	9	15	105.3	9	18	0	45.1	0	3	18	30.1	0	6	0	21.1	0	9	21.1	87.2	0	0	0	36.1	0	6
2007020	2007	5	18	15.41666667	36.00333333	135.83	270	150	16.02	15.37	16.76	34.57	34.59	34.58	53	0.39460716	9.7	33.8	14.5	0	38.6	0	0	0	0	26.5	33.8	0	0	0	28.9	0	41	12.1	50.6	0	2.4	0	12.1	0	4.8
2007021	2007	5	18	17	35.83666667	135.83	130	125	16.27	15.39	16.91	34.56	34.58	34.55	29	0.41431335	0	60.8	24.7	1.9	53.2	0	2.6	0	0	23.1	41.1	0	0	0	64.2	0	10.3	20.5	53.9	0	7.7	1.9	79.8	0	0
2007022	2007	5	19	6.266666667	35.67	135.83	80	75	15.98	15.58	16.72	34.36	34.51	34.27	12	0.83847606	0.4	11.9	0	0	1.2	0	4.4	0	0	6.7	0.8	0	0	0	4.4	0	0.4	0.4	5.1	0	0	0	0	0	0
2007023	2007	5	19	8.05	35.67	135.58	90	85	16.68	16.26	17	34.59	34.62	34.56	85	0.95940536	0	37	0	1.7	271.9	0	4.1	2.1	0	18.5	14.4	0	14.4	0	18.5	0	2.1	0	63.9	0	8.2	0.6	23.2	0	4.9
2007024	2007	5	19	10.06666667	35.83666667	135.58	200	150	15.48	12.84	16.46	34.53	34.59	34.57	84	0.72409374	2.7	39	5.4	0	1.4	0	3	0	3	54.2	45.2	0	0	0	54.2	0	9	27.1	195.9	0	6	1.4	28.3	0	0
2007025	2007	5	19	11.73333333	35.83666667	135.33	120	115	16.47	14.56	16.77	34.6	34.64	34.61	114	0.58359927	0	22.9	0	0	140.7	0	2	0	2	18.4	20.4	0	0	0	8.2	0	32.7	40.8	46.9	2	8.2	7	31.7	0	1.8
2007026	2007	5	19	13.81666667	35.67	135.33	70	65	16.51	15.86	16.88	34.52	34.57	34.5	43	1.3491149	0	66.6	0	0	50	0	10	0	0	68.2	10	0	0	0	8.3	0	0	5	36.6	0	1.7	2.7	9.5	0	0
2008001	2008	5	10	9.85	37.17	137.9966667	170	150	11.83	10.49	14.08	34.16	34.37	33.73	12	0.13533182	21.8	0	0	0	0	46.7	0	0	0	23.4	28	9.6	4.7	0	9.4	74.8	387.8	0	9.4	0	0	0	44	0	18.2
2008002	2008	5	10	11.93333333	37.17	137.6633333	990	150	10.98	8.82	14.37	34.12	34.23	33.96	18	0.139871	3.6	0	0	0	0	30.9	0	0	0	9.6	32.8	0.4	7.7	0	0	23.1	94.5	0	13.5	0	0	1.3	12.3	0	2.4
2008003	2008	5	10	13.35	37.003	137.6626667	69	64	12.62	12.04	12.98	34.07	34.16	34.07	33	0.061729074	7.8	0	2.5	0	0	11.1	0	0	0	25.9	18.5	3.8	3.7	3.7	0	18.5	199.4	0	22.2	0	0	0	47.1	0	19.8
2008004	2008	5	10	15.86666667	36.837	137.33	698	150	12.38	10.87	14.38	34.09	34.21	33.85	24	0.030354137	0	0	8.8	0	0	0	0	0	0	55.5	63.5	4	4	0	0	15.9	111	0	31.7	0	0	0	85.2	0	14.7
2008005	2008	5	11	7.266666667	36.84016667	137.0833333	336	150	12.48	8.71	14.61	33.83	34.21	29.01	54	0.449290536	2.5	2.8	12.7	5.1	0	0	3.3	3.3	0	52.1	48.8	0	3.3	0	3.3	39	52	0	91	0	0	0	55.7	0	0
2008006	2008	5	11	8.833333333	37.01216667	137.0935	104	99	13.59	10.85	14.49	34.04	34.24	33.91	62	0.56990236	0	0	59.1	0	0	0	3.1	0	0	15.5	74.6	0	0	0	0	15.5	15.5	0	93.2	0	0	7	65.7	0	8.8
2008007	2008	5	11	10.46666667	37.17133333	137.0981667	65	60	13.96	12.85	14.23	33.98	34.16	34.02	64	0.22633222	1.6	4.2	0	0	0	4.4	8.9	2.2	0	51	31	2.4	4.4	0	2.2	2.2	15.5	0	44.3	0	0	46.2	57	0	9.8
2008008	2008	5	11	12.06666667	37.17	137.33	1230	150	11.77	10.16	13.92	34.24	34.38	34.09	34	0.25067377	1.1	0.3	0	0	0	12.4	0	0	0	7.1	14.2	3.9	0	0	1.8	10.7	39.1	0	19.6	0	0	4.4	31.8	0	4.2
2008009	2008	5	11	13.41666667	37.33666667	137.33	100	95	12.34	9.26	14.6	34.08	34.3	33.91	36	0.19947597	1	0	9.8	1	0	6.8	1.7	0	0	23.7	15.2	0	0	0	0	3.4	16.9	0	13.5	0	0	3.4	24.2	0	10.8
2008010	2008	5	12	10.05	37.58666667	137.33	90	85	11.77	10.96	13.99	34.22	34.31	33.9	9	0.17067531	0	0	4.5	0	0	7.1	0	0	0	7.1	7.1	0	0	0	0	28.2	141	0	91.7	0	0	0.2	9.1	0	8.9
2008011	2008	5	12	14.23333333	37.50333333	136.9966667	90	85	12.45	11.47	13.57	34.3	34.37	34.21	26	0.07771644	0.9	0	1.4	0	0	13.9	0	1.9	0	15.6	5.2	7.8	5.2	0	1.7	8.7	12.1	0	22.5	0	0	3.9	7.4	0	30.4
2008012	2008	5	12	13.01666667	37.67	136.9966667	60	55	13.35	12.24	14.33	34.29	34.39	34.12	24	0.17078143	20	0.2	0	0	0	5.3	0	1.8	0	12.3	22.9	4.5	3.5	0	5.3	0	15.8	0	47.5	1.8	0	13.4	1.4	0	24.1
2008013	2008	5	13	8.666666667	37.67	136.6633333	120	115	12.21	8.79	14.21	34.29	34.47	33.95	21	0.12082561	1.3	2.7	0	0	0	16.9	0	0	0	7.5	26.2	13.7	1.9	0	1.9	1.9	46.9	0	61.8	1.9	0	12.3	8.1	0	13.4
2008014	2008	5	13	9.916666667	37.50333333	136.6633333	120	115	12.78	9.98	14.37	34.35	34.5	34.18	30	0.08041054	5.4	0.4	0	0	0	22.6	0	1.9	0	11.3	3.8	7	0	0	3.8	3.8	13.2	0	79.1	0	0	0.3	9.5	0	6.7
2008015	2008	5	13	11.16666667	37.33666667	136.6633333	100	95	12.07	10.27	13.19	33.99	34.48	34.29	47	0.07148287	18.7	0	0	0	0	39.8	0	11.4	0	5.7	17	0.3	0	5.7	5.7	17	34.1	0	215.9	0	0	3.3	15.6	0	15.6
2008016	2008	5	13	15.56666667	37.00333333	136.6633333	50	45	12.21	10.91	15.01	34.29	34.43	34.06	7	0.03685493	2	0	3.8	0	0	25.2	6.3	0	0	6.3	6.3	1.3	9.5	0	3.2	9.5	63.1	0	107.3	0	0	15.3	19.1	0	0
2008017	2008	5	13	16.86666667	36.83666667	136.6633333	40	35	12.8	11.84	13.96	34.14	34.39	34.21	7	0.449290536	15.6	0.3	5.2	0	0	21.2	63.6	0	0	28.3	14.1	0.3	7.1	14.1	14.1	0	91.8	0	226	0	0	0	0	0	0
2008018	2008	5	14	11.78333333	36.50333333	136.33	70	65	13.3	11.89	14.52	34.2	34.42	33.87	9	0.15233648	9.9	3.7	0	3.3	0	0	23.4	5.9	0	29.3	17.6	0	11.7	0	11.7	0	46.8	0	292.6	0	0	3.4	3.3	0	13.2
2008019	2008	5	15	8.983333333	36.17	135.9966667	100	95	13.42	11.37	15.13	34.26	34.48	34.09	16	0.111464694	7.5	2.8	0	0	0	0	11	3.7	7.3	33.1	7.3	0	7.3	7.3	7.3	3.7	69.8	0	154.2	0	0	0	7.5	0	67.3
2008020	2008	5	15	10.91666667	36.00333333	135.83	270	150	12.9	10.78	15.26	34.37	34.53	34.19	11	0.21162444	1.4	0.3	5.2	0	0	2	4.1	0	0	20.5	8.2	0	4.1	2	8.2	6.1	24.5	0	69.5	0	0	3.9	12.9	0	9
2008021	2008	5	15	12.53333333	35.83666667	135.83	130	125	13.2	10.73	15.39	34.01	34.5	34.23	13	0.05568986	4.3	4.1	16.2	0	0	0	3.5	0	0	45.8	14.1	0	14.1	0	14.1	0	63.4	0	59.9	0	0	2.1	24.4	0	8.1
2008022	2008	5	15	15.01666667	35.67	135.83	80	75	14.61	13.44	15.98	34.32	34.52	34.15	7	0.020137692	4.1	12.6	4.1	0	0	0	40.3	0	0	201.6	11.5	0	23	0	5.8	0	17.3	0	282.1	0	0	0	4.1	4.1	16.3
2008023	2008	5	16	8.183333333	35.67	135.58	90	85	14.08	11.29	16.05	34.32	34.54	33.8	11	0.3256506	0	5.8	6.2	0	0	0	6.7	0	0	30.1	6.7	0	3.4	0	13.4	0	10	0	157.3	0	0	0	6.4	0	14.5
2008024	2008	5	16	1.633333333	35.83666667	135.58	200	150	12.64	9.91	16.08	34.26	34.38	34.17	16	0.30378065	0	13.7	0	0	0	3.8	3.8	3.9	0	34	3.8	0	11.3	3.8	3.8	7.5	18.8	0	282	0	7.5	1.9	25.3	0	3.6
2008025	2008	5	16	12.46666667	35.83666667	135.33	120	115	13.41	11.31	15.92	34.38	34.54	33.5	7	0.30319136	2.7	0.2	7.8	0	0	0	0	4	4	48.1	0	0	0	0	40.1	0	48.1	0	136.4	0	0	7.9	15.6	0	2.6
2008026	2008	5	16	14.15	35.67	135.33	70	65	14.5	12.74	16.12	34.28	34.47	33.97	7	0.043225013	5	1.6	0	0	0	0	19.4	0	0	203.6	9.7	0	9.7	0	9.7	0	29.1	0	155.1	9.7	0	0	5	5	19.9
2009001	2009	5	10	8.7	37.17	137.9966667	170	150	12.73	12.01	15.66	33.94	34.16	32.4	8	0.36068985	18.4	0	0	0	0	51.1	5.7	0	0	17.2	50.9	0	45.2	33.9	5.7	96.1	463.6	0	5.7	0	0	9.6	26.9	0	29.9
2009002	2009	5	10	10.86666667	37.17	137.6633333	990	150	12.11	10.32	15.65	33.98	34.12	33.26	11	0.49569288	8.1	0	0	0	0	34.6	0	0	0	14.1	6.9	0	20.8	69.2	0	0	380.7	0	6.9	0	0	0	16	0	43.9
2009003	2009	5	10	12.53333333	37.003	137.6626667	69	64	13.63	12.64	15.53	33.83	34.15	33.05	16	0.449290536	3.8	0	0	0	0	0.2	0	0	0	35.2	23.1	4	30.8	7.7	3.9	19.3	142.6	0	11.6	0	0	0.9	18.3	0	36.7
2009004	2009	5	10	15.11666667	36.837	137.33	698	150	13.05	10.97	15.9	34.04	34.21	33.64	13	0.44627386	0.2	0	0	0	0	22.8	0	0	0	15.2	83.6	0.2	38	45.6	7.6	15.2	296.3	0	45.6	7.6	0	0.2	0	0	156.5
2009005	2009	5	11	6.616666667	36.84016667	137.0833333	336	150	12.83	10.86	15.45	34.04	34.16	33.78	12	0.5400478	3.5	0.2	0	0	0	0	0	0	0	39.2	43.8	0.2	14.6	34.1	0	87.6	107.1	0	29.2	9.7	0	3.3	3.2	0	60.1
2009006	2009	5	11	8.15	37.01216667	137.0935	104	99	13.47	12.07	15.35	34.12	34.2	33.96	10	0.33882847	0.8	0.5	4.3	0	0	6.4	0	0	6.4	102.9	45	0.6	96.4	19.3	25.7	12.9	32.2	0	6.4	0	0	4.7	8.7	0	52.1
2009007	2009	5	11	9.716666667	37.17133333	137.0981667	65	60	13.82	12.67	14.92	33.99	34.08	33.91	16	0.42427272	9.5	1.9	0	0	0	7.1	0	0	0	220.9	85.5	0	49.9	14.3	7.1	28.5	57	0	14.3	7.1	0	21.1	0.6	0	52.3
2009008	2009	5	11	11.16666667	37.17	137.33	1230	150	13.58	12.04	15.21	34.17	34.23	34.1	20	0.4220229	7	1.7	0	0	0	0	0	0	0	160.5	70.2	10	90.3	20.1	40.1	0	140.4	0	40.1	0	20.1	7	0	0	76.6
2009009	2009	5	11	12.46666667	37.33666667	137.33	100	95	13.83	12.56	15.6	34.11	34.32	33.97	6	0.38944855	0	3.2	8.3	0	0	32.5	0	0	0	346.9	97.6	0.4	249.3	21.7	10.8	86.7	184.3	0	75.9	0	0	17.5	43.5	0	190.8
2009010	2009	5	12	11	37.58666667	137.33	90	85	14.24	13.1	15.87	34.24	34.39	33.97	13	0.0875295	3.3	5.7	3.3	0	0	26.7	0	13.3	0	146.7	80	14.1	0	0	0	53.4	80	13.3	66.7	0	13.3	26.7	0	0	49.1
2009011	2009	5	12	15.5	37.50333333	136.9966667	90	85	14.66	13.46	16.32	34.2	34.3	34.07	19	0.5553489	5.3	10.6	0	0	0	0	0	4.8	0	145.3	19.4	0	4.8	0	19.4	0	38.7	33.9	67.8	0	9.7	12.9	0	0	63.9
2009012	2009	5	12	14.28333333	37.67	136.9966667	60	55	14.59	13.71	16.4	34.34	34.45	34.23	10	0.2011456	15.1	32.3	8	0	0	37.3	0	29.8	7.5	52.2	96.9	15.5	44.7	59.6	37.3	22.4	67.1	0	37.3	0	0	62.4	5.1	0	60.6
2009013	2009	5	13	9.216666667	37.67	136.6633333	120	115	13.48	11.32	15.24	34.3	34.41	34.22	23	0.5940351	0	0.9	0	0	0	253.5	0	12.1	0	24.1	96.6	1.2	0	12.1	48.3	96.6	120.7	24.1	0	0	0	24.7	4.9	0	4.9
2009014	2009	5	13	10.46666667	37.50333333	136.6633333	120	115	14.62	13.63	16.13	34.38	34.44	34.34	25	0.6471773	5.7	15.2	0	0	0	0	0	0	4	100.4	68.2	0.3	8	4	28.1	4	36.1	44.2	0	0	16.1	35.2	0	0	0
2009015	2009	5	13	11.68333333	37.33666667	136.6633333	100	95	14.68	14.18	16.26	34.33	34.41	34.24	16	0.31595626	12.5	5.7	0	0	0	0	0	9.4	0	159.4	93.8	0	4.7	18.8	14.1	0	46.9	18.8	46.9	4.7	23.4	13.2	9.4	0	18.8
2009016	2009	5	14	6.866666667	37.00333333	136.6633333	50	45	15.34	14.22	16.76	34.06	34.24	33.89	23	0.36518046	5.4	13.7	0	0	0	0	0	0	8.2	277.4	73.4	0	0	0	16.3	0	24.5	48.9	106	0	0	1.3	0	0	32.5
2009017	2009	5	14	8.433333333	36.83666667	136.6633333	40	35	16.12	14.51	16.53	34.09	34.31	34.07	30	0.29773787	0	27.9	0	0	0	0	0	9.9	34.5	157.6	177.3	0	0	0	9.9	0	9.9	78.8	54.2	0	9.9	3.4	0	0	56.2
2009018	2009	5	14	13.1	36.50333333	136.33	70	65	15.8	15.1	16.67	34.38	34.41	34.38	24	0.32482827	4.8	6.2	0	0	0	0	0	5.8	5.8	116.8	11.7	0.3	17.5	5.8	87.6	0	5.8	93.4	35	0	52.5	28.9	4.8	0	47.8
2009019	2009	5	15	7.733333333	36.17	135.9966667	100	95	15.44	14.6	16.11	34.33	34.42	33.9	37	0.20118342	3.3	1.1	6.6	0	0	0	0	14.4	0	28.8	9.6	0	28.8	9.6	81.5	14.4	4.8	81.5	43.2	0	33.6	13.2	3.3	9.9	69.3
2009020	2009	5	15	9.416666667	36.00333333	135.83	270	150	14.84	12.71	16.68	34.36	34.44	34.28	27	0.22272974	4.3	13.8	4.3	0	0	0	0	0	0	91.1	24.3	0	60.7	12.1	91.1	0	12.1	97.1	54.6	6.1	36.4	12.9	25.6	0	72.4
2009021	2009	5	15	10.98333333	35.83666667	135.83	130	125	14.86	13.37	16.41	34.29	34.45	34.2	24	0.29474974	3.3	28.4	0	0	0	0	4	4	0	145	12.1	0	8.1	16.1	28.2	0	28.2	24.2	36.2	8.1	8.1	4	6.4	22.5	64.2
2009022	2009	5	15	13.03333333	35.67	135.83	80	75	15.95	15.01	17.39	34.16	34.3	33.98	21	0.29693893	0	31.7	0	0	0	0	0	6.9	6.9	429.1	34.6	0	0	0	41.5	0	0	13.8	138.4	0	27.7	14.2	0	4.7	79.5
2009023	2009	5	16	9.2	35.67	135.58	90	85	15.56	14.45	17.09	34.02	34.4	34.19	16	0.33405071	7.7	10.6	0	0	0	0	0	4.1	0	134.8	4.1	0	16.3	8.2	16.3	4.1	8.2	8.2	44.9	0	16.3	2.8	0	33.2	17.9
2009024	2009	5	16	1.483333333	35.83666667	135.58	200	150	14.72	12.14	16.95	34.35	34.43	34.25	29	0.23013744	2.9	12.6	0	0	0	0	0	9.5	4.7	113.2	9.4	0	18.9	0	23.6	0	9.4	23.6	61.3	0	14.2	0.2	2.9	5.7	25.8
2009025	2009	5	16	12.9	35.83666667	135.33	120	115	15.57	12.31	17.05	34.16	34.41	34.12	40	0.449290536	23.5	1.9	7.8	0	0	0	0	44.3	0	143.9	33.2	0	66.4	22.1	110.7	0	44.3	33.2	110.7	0	44.3	0	54.7	7.8	125.1
2009026	2009	5	16	14.71666667	35.67	135.33	70	65	16.42	15.17	17.46	34.31	34.42	34.26	26	0.27858427	7.5	11.4	0	0	0	0	0	0	0	383.6	10.1	0	10.1	0	10.1	0	10.1	70.7	121.1	0	90.9	0	0	0	0
2010001	2010	5	8	8.633333333	37.17	137.9966667	170	150	10.95	9.64	12.45	34	34.08	33.95	12	0.449290536	0	0.3	0	0	0	42.2	0	0	0	10.7	42.2	0.4	36.9	0	0	189.9	216.3	0	63.3	0	0	8.2	121.6	0	0
2010002	2010	5	9	10.78333333	37.17	137.6633333	990	150	10.96	8.47	12.59	34.01	34.07	34.02	21	0.46087006	0	0.4	0	0	0	5.9	0	0	0	0	23.8	6.4	23.8	0	0	44.6	160.4	0	44.6	0	0	15.8	122.8	0	0
2010003	2010	5	9	12.66666667	37.003	137.6626667	69	64	11.27	10.39	12.59	33.88	34	33.43	25	0.22223958	4	0.2	11.9	0	0	227	0	0	0	0.4	107.2	6.7	25.2	0	0	132.4	94.6	0	44.1	0	0	19.8	49	0	23.8
2010004	2010	5	9	15.11666667	36.837	137.33	698	150	10.75	9.84	13.48	33.74	34.01	33.45	7	0.17432734	3.2	0	6.4	0	0	0	0	0	0	26	46.7	5.4	10.4	0	0	129.7	461.6	0	46.7	0	0	3.2	26.1	0	3.2
2010005	2010	5	9	16.95	36.84016667	137.0833333	336	150	11.22	10.11	13.08	33.9	33.97	33.8	14	0.449290536	2.6	0	2.6	0	0	11	0	0	0	3.8	29.3	3.9	47.6	0	0	58.6	168.4	0	47.6	0	0	2.9	135	0	18.4
2010006	2010	5	10	7.266666667	37.01216667	137.0935	104	99	11.06	9.95	12.61	33.91	34.01	33.64	34	0.6248542	5.2	0	10.1	0	0	22.8	0	0	0	7.8	45.7	0.3	22.8	0	0	152.3	312.2	0	83.8	0	0	5.1	167.9	0	0
2010007	2010	5	10	9.033333333	37.17133333	137.0981667	65	60	12.2	10.95	12.75	33.72	33.9	33.26	32	0.039996456	4.8	0	69	0	0	0	0	0	0	4.1	15.7	8.7	47.1	0	0	54.9	23.5	3.9	172.6	3.9	3.9	9	12.2	0	20
2010008	2010	5	10	11.2	37.17	137.33	1230	150	11.35	10.13	12.74	33.93	34	33.89	37	0.38098112	6	0	50	2.9	0	0	0	0	0	4.5	13.3	0	4.4	0	0	4.4	230.2	0	163.8	0	0	0	103.2	0	11.8
2010009	2010	5	10	12.43333333	37.33666667	137.33	100	95	11.96	10.66	13.22	33.87	34.03	33.83	23	0.66355133	6.5	0.2	56.4	0	0	20.7	0	0	0	7	10.4	3.9	27.6	0	0	27.6	89.8	0	96.7	0	0	15.6	172.6	0	6.5
2010010	2010	5	11	12.26666667	37.58666667	137.33	90	85	12.5	11.31	13.92	34.05	34.18	33.98	28	0.26300833	0	1.3	286.2	9.9	0	0	0	0	0	63	0	0.2	31.4	7.8	0	7.8	23.5	0	572.4	0	0	0	124.1	0	9.9
2010011	2010	5	11	16.31666667	37.50333333	136.9966667	90	85	13	11.83	14.28	34.09	34.2	33.81	22	0.27499378	4.3	1.3	0	4.3	0	0	0	0	0	93.4	0	0.2	93.2	8.5	0	0	50.8	0	542.3	0	0	0	74.4	0	30.3
2010012	2010	5	11	15.21666667	37.67	136.9966667	60	55	12.67	11.59	13.33	34.09	34.22	34.01	27	0.29464552	3.5	0.4	69.2	0	0	0	0	0	0	4.2	2	14.8	0	2	4.1	2	57.2	0	151.1	0	0	24.3	66.3	0	8.4
2010013	2010	5	12	9.783333333	37.67	136.6633333	120	115	12.48	10.76	13.68	34.29	34.38	34.3	33	0.21861771	16.6	0.3	11	0	0	22.4	0	0	0	11.2	0	0	16.8	5.6	27.9	0	55.9	11.2	273.8	0	5.6	2.9	11.8	0	0
2010014	2010	5	12	10.98333333	37.50333333	136.6633333	120	115	12.62	10.87	13.64	34.27	34.36	34.21	31	0.19782682	12.5	0.6	0	0	0	0	0	0	0	19.4	0	0.4	0	4.9	29.1	4.9	65.5	0	189.1	2.4	0	7.4	16.9	0	11.1
2010015	2010	5	12	12.15	37.33666667	136.6633333	100	95	13.11	11.82	14.17	34.28	34.38	34.21	28	0.06786087	8.7	7.1	2.9	0	0	6.5	0	0	0	45.7	0	0	0	0	32.5	0	19.5	0	403.4	0	0	17.5	0.8	0	2.9
2010016	2010	5	13	6.65	37.00333333	136.6633333	50	45	13.44	12.79	14.07	34.05	34.2	33.9	25	0.1772145	0	6	35.8	17.9	0	0	9.7	0	0	58	0	0	29	0	0	0	0	9.7	551	0	9.7	0	17.9	0	26.8
2010017	2010	5	13	7.983333333	36.83666667	136.6633333	40	35	13.62	12.99	13.9	34.02	34.12	33.95	29	0.29192382	4.1	0.8	493.7	16.5	0	0	0	0	0	49.4	0	0	32.9	0	0	0	0	16.5	534.8	0	8.2	0	89	0	12.3
2010018	2010	5	13	12.81666667	36.50333333	136.33	70	65	13.67	12.88	14.32	34.27	34.42	33.79	26	0.49714503	21.2	6.6	15.9	0	0	0	17.2	0	0	137.5	0	0	0	8.6	34.4	0	34.4	8.6	661.9	8.6	0	5.6	26.7	0	5.3
2010019	2010	5	14	8.75	36.17	135.9966667	100	95	13.38	12.35	14.5	34.27	34.38	33.87	37	0.21970238	8.5	22.4	0	0	0	14.9	44.8	14.9	0	208.9	29.8	0	0	29.8	59.7	14.9	164.1	14.9	0	0	0	4.7	241.6	4.3	128.1
2010020	2010	5	14	10.76666667	36.00333333	135.83	270	150	13.8	11.88	14.53	34.14	34.42	34.25	62	0.3653175	19.6	3.9	0	0	0	8.3	0	0	0	58.2	0	0	16.6	8.3	66.5	0	8.3	16.6	590.4	0	0	13.2	78.3	3.3	42.2
2010021	2010	5	14	12.33333333	35.83666667	135.83	130	125	13.31	12.2	14.59	34.32	34.43	34.28	36	0.3254615	11	2.1	0	0	0	0	0	0	0	587.4	13.4	0	26.7	13.4	26.7	0	26.7	13.4	881	0	0	22.4	5.9	0	11
2010022	2010	5	14	14.2	35.67	135.83	80	75	14.16	13.52	14.75	34.19	34.31	33.87	33	0.43403086	0	16.2	0	0	0	0	0	0	0	906	0	0	18.1	0	0	0	0	36.2	616.1	0	0	0	0	0	0
2010023	2010	5	15	8.116666667	35.67	135.58	90	85	14.3	13.66	14.83	34.34	34.41	34.27	36	0.519338	31.8	23.4	0	0	0	0	63.7	0	0	233.5	0	0	0	0	84.9	0	0	63.7	1125.1	0	21.2	0	0	0	0
2010024	2010	5	15	10.26666667	35.83666667	135.58	200	150	13.39	11.06	14.94	34.35	34.45	34.05	14	0.43573046	22.7	9.4	0	0	0	14.7	0	0	0	44.1	0	4.1	7.4	7.4	25.7	0	14.7	14.7	231.6	0	0	0.2	0	0	15.9
2010025	2010	5	15	11.7	35.83666667	135.33	120	115	14.28	11.75	15.3	34.36	34.45	34.21	36	0.5207423	24.6	1.7	6.1	0	0	0	0	10.9	0	239.2	0	0	0	21.8	76.1	0	54.4	43.5	837.3	10.9	0	0	0	6.1	36.9
2010026	2010	5	15	13.5	35.67	135.33	70	65	14.81	14.5	15.68	33.91	34.43	34.35	10	0.6480717	4.6	7.9	23	0	0	0	9.6	9.6	0	393.8	0	0	57.6	28.8	28.8	0	0	28.8	537.8	0	0	0	19.3	0	128.6
2011001	2011	5	24	18.91666667	37.17	137.9966667	170	150	10.99	10.08	13.14	33.89	34.07	33.32	13	1.0919877	0	0	0	0	0	243.5	0	0	0	0	46.6	0	0	0	0	41.5	186.5	0	10.4	0	0	0	2.7	0	18.3
2011002	2011	5	24	21.46666667	37.17	137.6633333	990	150	11.08	9.81	13.28	33.99	34.14	33.54	34	0.53025746	0	0	0	0	0	335.3	0	0	0	0	24.4	0	18.3	6.1	0	12.2	128	0	18.3	0	0	11.7	0	0	0
2011003	2011	5	25	6.683333333	37.003	137.6626667	69	64	13.73	12.77	14.9	33.79	33.96	33.28	15	0.449290536	0	4	8	0	0	6.5	0	0	6.5	45.7	39.2	6.5	202.5	32.7	0	26.1	156.7	0	71.8	0	0	11.9	0	0	19.9
2011004	2011	5	25	9.716666667	36.837	137.33	698	150	11.55	9.85	15.27	33.93	34.11	33.37	14	0.48578328	0	0	3.2	0	0	9.4	4.7	0	0	37.8	28.3	0	51.9	9.4	0	18.9	151.1	0	37.8	0	0	3.3	0	0	6.4
2011005	2011	5	25	11.86666667	36.84016667	137.0833333	336	150	11.86	9.07	15.78	33.98	34.15	33.64	14	0.4309534	0	2.3	0	0	0	0	12.1	4	0	20.1	8.1	0	12.1	8.1	0	0	156.9	0	28.2	0	0	6	0	0	12.1
2011006	2011	5	25	13.66666667	37.01216667	137.0935	104	99	11.45	8.95	16.23	33.97	34.1	33.66	23	0.09056089	1.8	0.4	111.5	0	0	44.1	17.6	0	0	41.1	5.9	0	64.6	11.8	0	8.8	14.7	0	26.4	0	0	5.5	3.7	0	18.3
2011007	2011	5	25	15.21666667	37.17133333	137.0981667	65	60	13.78	10.9	15.89	33.67	34.04	32.55	17	0.449290536	0	0.4	4	0	0	97.5	13	0	0	71.5	13	0	65	19.5	0	58.5	71.5	0	149.4	0	13	0.2	8.2	0	23.9
2011008	2011	5	25	17.33333333	37.17	137.33	1230	150	10.86	9.62	14.68	33.96	34.1	33.01	8	0.76005757	1.8	0	0	0	0	21.8	0	0	0	3.1	3.1	0	15.6	15.6	0	28.1	109.2	0	12.5	0	0	1.8	0	0	7.1
2011009	2011	5	25	18.75	37.33666667	137.33	100	95	12.38	9.77	14.44	33.83	34.1	32.77	7	1.1924795	7.4	0.4	56.5	0	0	89.9	6.4	0	0	19.3	6.4	0	0	0	0	0	212	0	0	0	0	7.5	0	0	32
2011010	2011	5	26	6.75	37.58666667	137.33	90	85	13.6	12.55	15.57	34.14	34.4	33.6	2	0.17127249	2.6	4.7	36	0	0	5.1	15.4	0	0	51.4	10.3	0.3	20.6	15.4	0	10.3	72	0	77.1	0	0	0	0	0	48.9
2011011	2011	5	26	9.15	37.50333333	136.9966667	90	85	14.14	12.64	15.63	34.22	34.44	33.91	16	0.449290536	8.6	16.2	5.7	0	0	0	8.9	0	0	115	13.3	0	17.7	17.7	8.9	13.3	75.2	0	106.2	0	4.4	2.9	2.9	0	22.8
2011012	2011	5	26	10.85	37.67	136.9966667	60	55	14.24	12.84	16.13	34.17	34.51	33.95	2	0.8643937	12.5	9	8.3	0	4.2	0	9.6	0	0	86.4	9.6	0	105.7	96	19.2	0	105.7	0	38.4	0	19.2	17	4.2	0	103.8
2011013	2011	5	26	12.96666667	37.67	136.6633333	120	115	14.07	13.24	16.64	34.44	34.56	33.82	14	0.449290536	6.5	7.7	0	0	0	0	5.1	5.1	0	35.9	10.3	0	20.5	15.4	107.8	0	92.4	0	164.3	0	5.1	6.8	6.5	0	35.5
2011014	2011	5	26	14.41666667	37.50333333	136.6633333	120	115	14.23	13.27	16.23	34.45	34.61	34	14	0.449290536	26.8	28.8	10.1	0	0	0	11.2	0	0	122.9	5.6	0	22.3	33.5	89.4	0	156.4	0	111.7	0	0	3.6	6.7	0	40.2
2011015	2011	5	26	15.88333333	37.33666667	136.6633333	100	95	14.15	13.57	15.85	34.47	34.6	34.1	12	0.449290536	20.7	42.9	0	0	0	0	8	8	8	184.8	8	0	16.1	32.1	32.1	0	144.6	0	168.7	0	16.1	0	12.4	0	58.1
2011016	2011	5	26	18.78333333	37.00333333	136.6633333	50	45	15.07	14.01	16.55	34.28	34.51	33.76	12	0.449290536	33.2	30.9	6.6	0	6.6	0	0	36.9	0	110.8	0	0	101.6	55.4	92.4	0	129.3	18.5	295.5	0	18.5	6.8	39.8	0	99.5
2011017	2011	5	26	20.26666667	36.83666667	136.6633333	40	35	15.76	14.75	16.29	34.06	34.26	33.91	18	0.07541565	15	36.8	15	0	25	0	0	0	0	359.9	20	0	10	0	30	0	30	60	260	0	0	0	0	0	105
2011018	2011	5	27	6.7	36.50333333	136.33	70	65	15.25	14.36	16.22	34.31	34.53	33.57	16	0.96278155	14.9	37.2	0	0	0	0	13.5	0	0	142.2	6.8	0	74.5	33.9	149	0	74.5	20.3	115.1	0	0	7.5	0	0	130.8
2011019	2011	5	27	9.983333333	36.17	135.9966667	100	95	14.94	13.85	17.04	34.49	34.61	34.16	10	0.112284675	2.3	27.8	2.3	0	0	5	5	0	0	25.1	15.1	0	25.1	10.1	40.2	0	50.3	10.1	75.4	0	0	2.3	22.6	9.1	29.4
2011020	2011	5	27	12.28333333	36.00333333	135.83	270	150	13.91	11.24	17.05	34.49	34.62	33.97	12	0.449290536	1.8	13	0	0	3.7	0	5.9	0	0	5.9	3	0	8.9	5.9	68	0	8.9	56.2	68	0	5.9	7.3	7.3	0	22
2011021	2011	5	27	14.16666667	35.83666667	135.83	130	125	14.38	12.2	16.94	34.51	34.62	34.3	9	0.024401696	9.2	29.8	0	0	0	13	0	9.8	0	6.5	0	0	9.8	9.8	104	0	9.8	61.7	100.7	0	9.8	5.5	20.2	3.7	47.7
2011022	2011	5	27	15.91666667	35.67	135.83	80	75	16.07	14.63	17.67	34.29	34.48	33.62	20	2.2842598	6.9	87	10.4	0	3.5	0	12	0	0	78.1	6	0	42.1	24	24	0	0	30.1	270.4	0	6	13.8	103.6	0	58.7
2011023	2011	5	27	17.88333333	35.67	135.58	90	85	15.77	14.27	17.39	34.31	34.58	33.8	23	1.5701504	6.1	37.2	0	0	21.3	0	0	0	0	37.5	0	0	68.7	18.7	81.1	0	6.2	112.3	93.6	0	12.5	6.1	55	0	100.6
2011024	2011	5	27	19.71666667	35.83666667	135.58	200	150	14.69	12.32	17.18	34.4	34.61	33.9	20	0.449290536	5.9	24.6	2	0	17.7	3.9	0	0	0	34.7	7.7	0	19.3	7.7	73.3	0	3.9	88.8	100.3	0	7.7	3.9	2.7	2	59.1
2011025	2011	5	28	6.766666667	35.83666667	135.33	120	115	15.05	13.81	17.46	34.44	34.63	33.83	11	0.449290536	2.8	35.1	5.7	0	5.7	8.1	0	4	0	12.1	4	0	4	8.1	40.3	0	4	32.3	104.9	0	36.3	0	5.8	11.4	56.8
2011026	2011	5	28	8.333333333	35.67	135.33	70	65	15.31	14.74	16.63	34.25	34.44	33.91	8	0.5371745	5.6	48.4	0	0	5.6	0	9.7	0	0	116	0	0	9.7	9.7	48.4	0	0	9.7	483.5	0	9.7	0	5.9	0	45.1
2012001	2012	5	22	19.98333333	37.17	137.9966667	170	150	12.18	10	15.44	34.2	34.29	33.86	11	3.7087705	0	0.4	44.2	0	0	25.8	0	0	0	0	18.4	3.7	0	7.4	0	3.7	365	18.4	47.9	0	3.7	41.8	11.4	0	38.7
2012002	2012	5	23	7	37.17	137.6633333	990	150	11.31	9.41	15.89	34.21	34.37	34.11	12	0.34351018	0.9	1.1	0	0	0	23.8	0	0	0	2.4	13.1	4.8	2.4	1.2	2.4	13.1	60.8	0	13.1	1.2	1.2	29.8	16.7	0	6.1
2012003	2012	5	23	8.766666667	37.003	137.6626667	69	64	14.53	13.15	16.02	34.18	34.35	33.54	9	0.8177198	6.4	0	38.6	12.9	0	4.6	0	0	0	9.2	22.9	4.6	0	0	9.2	0	361.8	41.2	55	0	0	106.1	0	0	112.6
2012004	2012	5	23	12.06666667	36.837	137.33	698	150	12.47	9.92	15.26	34.27	34.43	34.13	8	0.3616998	3.3	0	2.2	0	0	12.2	0	0	0	0	6.1	0.2	0	2	12.2	2	146.7	18.3	22.4	0	0	42.7	2.2	0	58
2012005	2012	5	23	14.31666667	36.84016667	137.0833333	336	150	12.14	9.22	17.07	34.21	34.35	33.83	9	0.5276992	0	1.6	1.5	0	0	4.2	0	0	0	2.1	4.2	0	2.1	0	4.2	0	184.7	0	33.6	0	0	13.3	8.9	0	7.4
2012006	2012	5	23	16.68333333	37.01216667	137.0935	104	99	13.42	10.49	16.57	34.33	34.43	34.23	13	0.3198138	10.9	0.3	0	2.7	0	15.1	0	0	0	0	30.2	3.8	11.3	11.3	18.9	3.8	237.9	18.9	30.2	7.6	0	57.5	11	0	131.2
2012007	2012	5	23	18.4	37.17133333	137.0981667	65	60	15.21	14.11	16.69	34.3	34.38	34.21	8	0.29721305	8.1	3.9	8.1	5.4	0	0	0	0	0	2.7	18.9	0.4	5.4	16.2	18.9	0	27	13.5	72.9	0	0	48.8	0.5	0	143.1
2012008	2012	5	23	20.6	37.17	137.33	1230	150	12.71	9.55	15.94	34.32	34.44	34.28	11	0.22035833	5.2	1.2	1.7	0.9	0	13.9	0	2.8	0	1.4	16.6	4.2	1.4	0	12.5	0	56.9	31.9	37.4	1.4	1.4	43.4	11	0	39.7
2012009	2012	5	24	6.833333333	37.33666667	137.33	100	95	14.92	12.44	16.39	34.3	34.42	34.22	16	0.2387483	0	2.1	4.2	0	0	4.2	0	12.6	0	20.9	25.1	4.3	25.1	12.6	4.2	0	16.7	41.8	121.3	0	0	4.3	0	0	33.5
2012010	2012	5	24	14.08333333	37.58666667	137.33	90	85	14.99	13.96	16.74	34.4	34.47	34.22	17	0.12798372	2.7	4	21.8	8.2	0	0	0	7.9	0	15.8	15.8	8	0	23.7	47.5	0	39.6	0	146.4	7.9	7.9	21.9	0	5.4	225.8
2012011	2012	5	25	6.833333333	37.50333333	136.9966667	90	85	15.9	14.31	17.4	34.34	34.48	34.26	21	0.23029618	0	23.6	0	0	0	0	0	0	0	12.4	24.8	0	6.2	6.2	68.1	0	0	61.9	315.7	0	0	0	0	8.9	195.6
2012012	2012	5	24	17.71666667	37.67	136.9966667	60	55	15.61	14.46	17.26	34.46	34.51	34.38	11	0.2920277	29.9	30.3	0	0	0	0	0	0	0	18.9	75.4	0.4	0	28.3	56.6	0	75.4	103.7	254.6	0	18.9	6.1	0	179.3	388.5
2012013	2012	5	25	11.56666667	37.67	136.6633333	120	115	13.03	10.3	17.12	34.43	34.51	34.42	9	0.30208018	0	4.1	0	0	0	61.3	0	0	0	5.1	102.2	0	5.1	10.2	20.4	30.7	316.8	0	40.9	0	5.1	17.4	30.8	0	65.1
2012014	2012	5	25	13.13333333	37.50333333	136.6633333	120	115	14.36	12.39	17.27	34.47	34.52	34.38	13	0.21506679	6.2	12.9	0	0	0	5	0	15	0	10	34.9	5	15	10	74.8	0	219.4	15	149.6	0	10	12.5	12.4	6.2	167.5
2012015	2012	5	25	14.76666667	37.33666667	136.6633333	100	95	15.82	14.85	17.57	34.35	34.5	33.94	13	0.27701557	3	15.5	15	3	0	0	0	4.2	4.2	24.9	33.2	0	8.3	12.5	33.2	0	33.2	54	195.1	0	0	6	9	18	200.6
2012016	2012	5	26	6.75	37.00333333	136.6633333	50	45	16.24	15.43	17.53	34.39	34.48	34.2	14	0.3120176	4.4	4.6	0	0	4.4	0	0	6.8	0	20.3	13.5	0	0	6.8	0	0	40.6	0	283.9	0	33.8	33.8	0	8.7	296.1
2012017	2012	5	26	8.416666667	36.83666667	136.6633333	40	35	16.83	15.89	17.69	34.34	34.47	34.32	10	0.27110246	7.8	7.8	19.5	0	27.3	0	0	0	0	5.4	16.1	0	0	16.1	21.5	0	32.3	107.6	188.4	5.4	16.1	0	0	0	385.8
2012018	2012	5	26	13.9	36.50333333	136.33	70	65	16.36	15.71	17.68	34.38	34.47	34.25	10	0.30901092	13.4	18.6	4.5	0	4.5	0	0	0	0	34.4	11.5	0	5.7	0	22.9	0	34.4	189	183.3	0	11.5	13.4	0	9	102.9
2012019	2012	5	27	6.733333333	36.17	135.9966667	100	95	15.95	14.71	17.91	34.49	34.52	34.44	14	0.38381392	4.5	17.7	4.5	0	2.2	0	0	6.6	0	3.4	13	0	0	0	78.2	0	9.8	29.3	81.5	6.5	9.8	0	18.1	9	85.2
2012020	2012	5	27	9.083333333	36.00333333	135.83	270	150	15.14	11.95	17.8	34.46	34.53	34.32	10	0.35344106	0	2.5	2.5	0	24.7	4.3	0	0	0	69.1	21.6	0	0	13	51.9	0	25.9	151.2	112.4	4.3	21.6	0	0	7.4	130.9
2012021	2012	5	27	10.88333333	35.83666667	135.83	130	125	15.64	14.41	17.96	34.49	34.52	34.46	12	0.15530726	3.9	11.8	0	0	0	0	0	9.4	0	6.3	6.3	0	0	6.3	31.5	0	31.5	37.8	59.8	0	6.3	21.6	11.8	25.5	58.8
2012022	2012	5	27	13	35.67	135.83	80	75	16.68	15.53	18.17	34.4	34.49	34.36	16	0.449290536	0	22.1	0	0	66.2	0	0	3.5	0	48.8	17.4	0	31.3	0	7	0	10.5	45.3	181.1	0	7	0	0	0	83.6
2012023	2012	5	27	15	35.67	135.58	90	85	16.82	15.88	18.18	34.44	34.5	34.27	9	0.15832971	3.5	11	0	0	101.8	0	0	5.9	0	17.7	11.8	0	23.6	0	123.9	0	17.7	88.5	112.1	0	11.8	10.5	0	31.6	28.1
2012024	2012	5	27	17.25	35.83666667	135.58	200	150	14.33	9.34	18.26	34.41	34.5	34.36	14	0.30441526	0	6.1	2	0	30	2	0	0	0	4	4	0	10	0	12	0	0	58.1	76.1	0	2	10	2	10	32
2012025	2012	5	27	18.93333333	35.83666667	135.33	120	115	15.98	13.9	17.75	34.46	34.51	34.31	13	0.50689065	7.5	11.9	3.7	0	394.8	0	0	12.1	0	145.4	103	0	48.5	6.1	109.1	0	36.4	72.7	109.1	18.2	42.4	0	0	3.7	74.5
2012026	2012	5	28	9.216666667	35.67	135.33	70	65	17.11	16.4	18.12	34.42	34.48	34.34	13	0.449290536	5.4	12.3	0	0	239.2	0	0	16.7	0	41.9	100.5	8.4	8.4	0	142.3	0	0	117.2	150.7	8.4	33.5	0	0	5.4	38.1
2013001	2013	5	21	19.53333333	37.17	137.9966667	170	150	11.43	10.28	15.31	33.93	34.15	32.9	7	0.7257664	0	0	6.7	0	0	0	0	0	0	0	0	0	0	14.1	0	0	738.2	0	28.1	0	0	6.7	13.5	0	3.4
2013002	2013	5	22	6.516666667	37.17	137.6633333	990	150	11.45	10.37	15.73	34.07	34.34	34.14	8	0.3464675	0	0	0	0	0	12.7	0	6.4	0	19.1	12.7	6.4	12.7	38.1	0	38.1	457.7	0	76.3	0	0	0	45.7	0	37.4
2013003	2013	5	22	8.033333333	37.003	137.6626667	69	64	14.14	12.72	15.92	33.95	34.18	33.71	9	0.57775176	0	6.7	254.6	78.8	0	0	0	0	0	60	0	0	94.1	0	0	8.6	324.9	0	342	0	0	0	18.2	0	6.1
2013004	2013	5	22	11.41666667	36.837	137.33	698	150	13.3	10.67	16.45	34.05	34.32	33.59	9	0.9366277	0	0	49.2	0	0	0	0	0	0	40.8	35	0	5.8	5.8	0	5.8	291.4	0	209.8	0	5.8	7.6	49.2	0	22.7
2013005	2013	5	22	13.88333333	36.84016667	137.0833333	336	150	13.78	10.83	16.89	34.14	34.34	33.9	8	0.2887357	4.1	0	28.9	28.9	0	0	0	0	0	66	0	0	33	0	0	0	252.9	0	373.8	0	22	8.3	24.8	0	103.2
2013006	2013	5	22	16.11666667	37.01216667	137.0935	104	99	13.87	10.81	16.31	34.27	34.42	34.2	19	0.6582006	4.2	13.2	8.4	0	0	0	0	7.3	0	87.2	79.9	0	21.8	14.5	0	0	181.6	0	225.1	0	0	0	58.8	16.8	88.2
2013007	2013	5	22	18.26666667	37.17133333	137.0981667	65	60	15.55	13.97	16.77	34.28	34.34	34.21	8	0.6982645	0	16.9	15.9	55.7	0	0	0	14.6	29.3	278.1	102.5	0	73.2	43.9	29.3	0	131.7	0	1419.7	0	43.9	16.2	366	55.7	167
2013008	2013	5	23	6.666666667	37.17	137.33	1230	150	12.6	10.57	16.17	34.2	34.47	34.45	18	0.40402064	9.6	0	0	0	0	0	0	0	0	15.1	45.3	0	22.6	30.2	15.1	7.5	558.2	0	135.8	0	0	0	38.7	0	72.2
2013009	2013	5	23	8.216666667	37.33666667	137.33	100	95	15.26	14.14	16.21	34.37	34.4	34.29	35	0.47992966	15.3	11.2	25.5	5.1	0	0	0	16.9	0	75.8	16.9	0	16.9	25.3	8.4	16.9	101.1	0	404.5	0	0	30.9	183.9	15.3	178.4
2013010	2013	5	23	15.5	37.58666667	137.33	90	85	15.23	14.02	16.43	34.43	34.48	34.37	20	0.6088914	18.1	7.7	18.1	0	0	0	8.7	0.3	17.5	43.6	26.2	0.5	43.6	34.9	113.4	17.5	218.1	0	453.7	0	26.2	6.3	30.2	60.3	96.5
2013011	2013	5	24	15.55	37.50333333	136.9966667	90	85	14.82	13.36	16.88	34.39	34.49	34.33	14	0.45267928	15.2	20.8	7.6	0	0	0	0	0	6.8	41	20.5	0	27.3	27.3	54.7	0	88.9	0	239.2	0	13.7	7.6	87.3	0	94.9
2013012	2013	5	24	14.13333333	37.67	136.9966667	60	55	14.93	12.59	16.64	34.37	34.43	34.41	14	0.44426253	0	2	0	0	0	5.7	0	5.7	0	45.5	39.8	0.3	11.4	56.9	11.4	11.4	176.3	0	182	0	0	21.9	25.5	0	67.7
2013013	2013	5	25	6.35	37.67	136.6633333	120	115	13.57	11.31	17.1	34.36	34.52	34.49	17	0.45914963	14.1	6.7	0	0	0	4.5	4.5	4.5	0	13.5	45.2	0	22.6	31.6	45.2	0	130.9	0	203.2	4.5	18.1	0	0	0	31
2013014	2013	5	25	7.933333333	37.50333333	136.6633333	120	115	14.28	13.42	17.78	34.36	34.43	34.11	8	0.30834436	9.2	10.4	3.1	0	0	0	0	0	0	56.1	33.6	0	0	5.6	22.4	0	117.7	0	291.5	0	11.2	12.4	43.1	0	12.3
2013015	2013	5	25	9.466666667	37.33666667	136.6633333	100	95	14.86	13.61	17.53	34.38	34.5	33.91	10	0.377201	19.3	6.3	33.1	2.8	0	0	20.1	15.1	15	135.4	15	0	0	10	50.1	0	35.1	5	100.3	0	0	8.3	41.3	0	35.8
2013016	2013	5	25	15.03333333	37.00333333	136.6633333	50	45	15.17	13.87	17.59	34.18	34.31	33.95	11	0.28423193	14.6	0.5	136.2	0	0	0	23.8	7.9	0	317.5	31.8	0	0	7.9	103.2	0	55.6	0	150.8	0	0	0	14.6	0	24.3
2013017	2013	5	25	16.61666667	36.83666667	136.6633333	40	35	15.66	14.11	17.34	34	34.29	33.69	11	0.59204745	0	0	93	8.9	0	0	39.8	0	1.5	22.1	4.4	0	1.5	0	5.9	0	3	7.4	7.4	0	0	0	0	0	1.5
2013018	2013	5	26	8.666666667	36.50333333	136.33	70	65	16.13	14.41	17.67	34.38	34.49	34.24	24	0.5759764	6.8	14.1	6.8	0	0	0	0	8.1	0	72.6	12.1	0	0	8	32.1	0	40.2	0	116.5	0	4	0	2.3	9	20.3
2013019	2013	5	26	14.7	36.17	135.9966667	100	95	15.9	14.54	18.74	34.47	34.52	34.51	16	0.2905421	9.2	7.5	6.9	0	0	0	3.1	3.1	3.1	18.4	6.1	0	0	42.9	21.5	0	6.1	12.3	190	0	18.4	0	0	50.6	9.2
2013020	2013	5	26	16.85	36.00333333	135.83	270	150	15.03	12.65	18.54	34.45	34.56	34.48	11	0.43990052	18.2	3.9	9.1	0	1.3	0	0	2.2	2.2	4.5	0	0	0	4.5	33.5	0	4.5	4.5	113.8	0	6.7	1.3	9.1	50.8	41.7
2013021	2013	5	26	18.61666667	35.83666667	135.83	130	125	15.53	13.76	18.35	34.46	34.51	34.37	14	0.3169509	18.5	4.1	0	0	2.1	0	0	0	3.1	9.4	28.2	0	3.1	3.1	40.7	0	0	18.8	143.9	0	12.5	0	12.3	8.2	30.8
2013022	2013	5	27	6.716666667	35.67	135.83	80	75	16.44	15.48	18.86	34.37	34.44	34.21	12	0.4451978	0	4.3	4.2	2.1	8.3	0	16.7	2.1	0	39.6	4.2	0	0	0	4.2	0	0	6.3	31.3	0	4.2	4.2	0	429.5	12.5
2013023	2013	5	27	8.666666667	35.67	135.58	90	85	16.25	14.87	18.93	34.48	34.52	34.48	9	0.3532824	0	0.2	0	0	2.6	0	3.3	0	6.7	26.6	13.3	0	3.3	6.7	30	0	0	30	103.2	0	20	0	0	62.8	41.9
2013024	2013	5	27	11.15	35.83666667	135.58	200	150	15.38	13.68	18.76	34.47	34.53	34.47	9	0.35443354	5.7	1.6	0	0	4.3	0	0	0	0	8.3	2.1	0	0	2.1	20.7	0	0	4.1	95.1	2.1	16.5	1.4	7.1	52.6	12.8
2013025	2013	5	27	13.05	35.83666667	135.33	120	115	16.4	14.94	18.93	34.45	34.49	34.49	12	0.33397833	0	3.1	0	0	3	0	0	0	6	59.6	14.9	0	6	3	14.9	0	0	6	128.1	0	3	3	0	50.7	3
2013026	2013	5	27	15.08333333	35.67	135.33	70	65	17.28	16.24	18.88	34.47	34.5	34.47	9	0.1620727	0	0	0	0	15.3	0	0	10.2	0	66.2	0	0	10.2	5.1	0	0	0	15.3	96.7	0	5.1	0	10.2	147.7	5.1
