# Supplementary material for: Spatial variations in zooplankton community structure along the Japanese coastline in the Japan Sea: influence of the coastal current
Source: Copernicus journal article supplement (doi:10.5194/os-14-355-2018), 2018-06-01
Supplement: Supplementary file 1 [file os-14-355-2018-supplement.zip › os-14-355-2018-supplement-title-page.pdf]

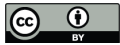

## *Supplement of*

# **Spatial variations in zooplankton community structure along the Japanese coastline in the Japan Sea: influence of the coastal current**

**Taketoshi Kodama et al.**

*Correspondence to:* Taketoshi Kodama (takekodama@affrc.go.jp)

- [os-14-355-2018-supplement-title-page.pdf](#)
- [datasets.csv](#)

The copyright of individual parts of the supplement might differ from the CC BY 4.0 License.
